# Supplementary material
Source: publisher figshare collection journal article supplement (https://acs.figshare.com/ndownloader/files/4463404)
Supplement: Supplementary file 1 [file 4463404]

 
data_comp1 
 
_audit_creation_method            SHELXL-97 
_chemical_name_systematic 
; 
 ? 
; 
_chemical_name_common             ? 
_chemical_melting_point           ? 
_chemical_formula_moiety          ? 
_chemical_formula_sum 
 'H4 I4 K2 Mn O14' 
_chemical_formula_weight          868.77 
 
loop_ 
 _atom_type_symbol 
 _atom_type_description 
 _atom_type_scat_dispersion_real 
 _atom_type_scat_dispersion_imag 
 _atom_type_scat_source 
 'O'  'O'   0.0106   0.0060 
 'International Tables Vol C Tables 4.2.6.8 and 6.1.1.4' 
 'H'  'H'   0.0000   0.0000 
 'International Tables Vol C Tables 4.2.6.8 and 6.1.1.4' 
 'K'  'K'   0.2009   0.2494 
 'International Tables Vol C Tables 4.2.6.8 and 6.1.1.4' 
 'Mn'  'Mn'   0.3368   0.7283 
 'International Tables Vol C Tables 4.2.6.8 and 6.1.1.4' 
 'I'  'I'  -0.4742   1.8119 
 'International Tables Vol C Tables 4.2.6.8 and 6.1.1.4' 
 
_symmetry_cell_setting            monoclinic  
_symmetry_space_group_name_H-M    I2
 
loop_ 
 _symmetry_equiv_pos_as_xyz 
 'x, y, z' 
 '-x, y, -z' 
 'x+1/2, y+1/2, z+1/2' 
 '-x+1/2, y+1/2, -z+1/2' 
 
_cell_length_a                    8.356(5) 
_cell_length_b                    7.7609(18) 
_cell_length_c                    11.166(4) 
_cell_angle_alpha                 90.00 
_cell_angle_beta                  90.09(3) 
_cell_angle_gamma                 90.00 
_cell_volume                      724.1(5) 
_cell_formula_units_Z             2 
_cell_measurement_temperature     293(2) 
_cell_measurement_reflns_used     1149  
_cell_measurement_theta_min        3.0425
_cell_measurement_theta_max       27.4797  
 
_exptl_crystal_description        'Prism'  
_exptl_crystal_colour             'White'
_exptl_crystal_size_max           0.2000 
_exptl_crystal_size_mid           0.2000 
_exptl_crystal_size_min           0.1800  
_exptl_crystal_density_meas       ? 
_exptl_crystal_density_diffrn     3.985 
_exptl_crystal_density_method     'not measured' 
_exptl_crystal_F_000              782 
_exptl_absorpt_coefficient_mu     10.081 
_exptl_absorpt_correction_type    'Multi-scan' 
_exptl_absorpt_correction_T_min   0.7249 
_exptl_absorpt_correction_T_max   1.0000  
_exptl_absorpt_process_details    ? 
 
_exptl_special_details 
; 
 ? 
; 
 
_diffrn_ambient_temperature       293(2) 
_diffrn_radiation_wavelength      0.71073 
_diffrn_radiation_type            MoK\a 
_diffrn_radiation_source          'fine-focus sealed tube' 
_diffrn_radiation_monochromator   graphite 
_diffrn_measurement_device_type   Mercury70  
_diffrn_measurement_method        'CCD_Profile_fitting' 
_diffrn_detector_area_resol_mean  14.6306 
_diffrn_standards_number          ? 
_diffrn_standards_interval_count  ? 
_diffrn_standards_interval_time   ? 
_diffrn_standards_decay_%         ? 
_diffrn_reflns_number             2779 
_diffrn_reflns_av_R_equivalents   0.0175 
_diffrn_reflns_av_sigmaI/netI     0.0227 
_diffrn_reflns_limit_h_min        -10 
_diffrn_reflns_limit_h_max        10 
_diffrn_reflns_limit_k_min        -7 
_diffrn_reflns_limit_k_max        10 
_diffrn_reflns_limit_l_min        -13 
_diffrn_reflns_limit_l_max        14 
_diffrn_reflns_theta_min          3.20 
_diffrn_reflns_theta_max          27.48 
_reflns_number_total              1385 
_reflns_number_gt                 1376 
_reflns_threshold_expression      >2sigma(I) 
 
_computing_data_collection        ? 
_computing_cell_refinement        ? 
_computing_data_reduction         ? 
_computing_structure_solution     'SHELXS-97 (Sheldrick, 1990)' 
_computing_structure_refinement   'SHELXL-97 (Sheldrick, 1997)' 
_computing_molecular_graphics     ? 
_computing_publication_material   ? 
 
_refine_special_details 
; 
 Refinement of F^2^ against ALL reflections.  The weighted R-factor wR and 
 goodness of fit S are based on F^2^, conventional R-factors R are based 
 on F, with F set to zero for negative F^2^. The threshold expression of 
 F^2^ > 2sigma(F^2^) is used only for calculating R-factors(gt) etc. and is 
 not relevant to the choice of reflections for refinement.  R-factors based 
 on F^2^ are statistically about twice as large as those based on F, and R- 
 factors based on ALL data will be even larger. 
; 
 
_refine_ls_structure_factor_coef  Fsqd  
_refine_ls_matrix_type            full 
_refine_ls_weighting_scheme       calc  
_refine_ls_weighting_details 
 'calc w=1/[\s^2^(Fo^2^)+(0.0148P)^2^+0.0000P] where P=(Fo^2^+2Fc^2^)/3' 
_atom_sites_solution_primary      direct 
_atom_sites_solution_secondary    difmap 
_atom_sites_solution_hydrogens    geom 
_refine_ls_hydrogen_treatment     none 
_refine_ls_extinction_method      SHELXL 
_refine_ls_extinction_coef        0.00350(11) 
_refine_ls_extinction_expression 
 'Fc^*^=kFc[1+0.001xFc^2^\l^3^/sin(2\q)]^-1/4^' 
_refine_ls_abs_structure_details 
 'Flack H D (1983), Acta Cryst. A39, 876-881' 
_refine_ls_abs_structure_Flack    0.00 
_refine_ls_number_reflns          1385 
_refine_ls_number_parameters      102 
_refine_ls_number_restraints      1 
_refine_ls_R_factor_all           0.0140 
_refine_ls_R_factor_gt            0.0139 
_refine_ls_wR_factor_ref          0.0314 
_refine_ls_wR_factor_gt           0.0313 
_refine_ls_goodness_of_fit_ref    1.020 
_refine_ls_restrained_S_all       1.020 
_refine_ls_shift/su_max           0.001 
_refine_ls_shift/su_mean          0.000 
 
loop_ 
 _atom_site_label 
 _atom_site_type_symbol 
 _atom_site_fract_x 
 _atom_site_fract_y 
 _atom_site_fract_z 
 _atom_site_U_iso_or_equiv 
 _atom_site_adp_type 
 _atom_site_occupancy 
 _atom_site_symmetry_multiplicity 
 _atom_site_calc_flag 
 _atom_site_refinement_flags 
 _atom_site_disorder_assembly 
 _atom_site_disorder_group 
K1 K 1.0000 1.8709(3) 1.0000 0.0183(5) Uani 1 2 d S . . 
K2 K 1.0000 1.3455(3) 1.0000 0.0209(5) Uani 1 2 d S . . 
Mn1 Mn 0.5000 1.41278(18) 1.0000 0.0118(2) Uani 1 2 d S . . 
I1 I 1.24082(3) 2.08972(4) 0.72314(2) 0.01122(8) Uani 1 1 d . . . 
I2 I 0.74786(3) 1.60457(4) 0.76076(2) 0.01160(9) Uani 1 1 d . . . 
O1 O 1.4385(3) 2.1056(6) 0.6599(3) 0.0190(7) Uani 1 1 d . . . 
O2 O 1.1756(4) 1.8963(5) 0.6429(3) 0.0178(8) Uani 1 1 d . . . 
O3 O 1.2781(4) 1.9912(5) 0.8662(3) 0.0192(8) Uani 1 1 d . . . 
O4 O 0.7303(4) 1.7914(5) 0.8575(4) 0.0166(8) Uani 1 1 d . . . 
O5 O 0.7065(4) 1.4425(5) 0.8745(4) 0.0171(9) Uani 1 1 d . . . 
O6 O 0.5591(3) 1.6155(6) 0.6826(3) 0.0173(7) Uani 1 1 d . . . 
O1W O 0.5000 1.6878(8) 1.0000 0.0330(15) Uani 1 2 d S . . 
H1WA H 0.4252 1.7244 1.0457 0.049 Uiso 0.50 1 d PR . . 
H1WB H 0.5904 1.7244 1.0257 0.049 Uiso 0.50 1 d PR . . 
O2W O 0.5000 1.1423(6) 1.0000 0.0323(15) Uani 1 2 d S . . 
H2WA H 0.5904 1.1057 1.0257 0.048 Uiso 0.50 1 d PR . . 
H2WB H 0.4844 1.1057 0.9286 0.048 Uiso 0.50 1 d PR . . 
 
loop_ 
 _atom_site_aniso_label 
 _atom_site_aniso_U_11 
 _atom_site_aniso_U_22 
 _atom_site_aniso_U_33 
 _atom_site_aniso_U_23 
 _atom_site_aniso_U_13 
 _atom_site_aniso_U_12 
K1 0.0210(9) 0.0153(9) 0.0185(11) 0.000 -0.0016(7) 0.000 
K2 0.0303(11) 0.0163(10) 0.0161(11) 0.000 -0.0043(9) 0.000 
Mn1 0.0120(5) 0.0113(6) 0.0120(5) 0.000 -0.0026(5) 0.000 
I1 0.01113(12) 0.01077(17) 0.01175(13) 0.00032(18) -0.00143(10) -0.00060(19) 
I2 0.01006(12) 0.0135(2) 0.01130(13) 0.0009(2) 0.00047(11) 0.0000(2) 
O1 0.0134(13) 0.0219(19) 0.0218(15) 0.000(2) 0.0037(11) -0.0015(19) 
O2 0.0222(17) 0.0132(19) 0.0182(17) -0.0028(15) -0.0081(14) -0.0018(16) 
O3 0.0253(19) 0.0175(18) 0.0148(17) 0.0070(14) -0.0049(14) -0.0045(15) 
O4 0.021(2) 0.0139(18) 0.015(2) -0.0024(15) 0.0014(17) -0.0029(18) 
O5 0.019(2) 0.016(2) 0.0163(19) 0.0018(16) 0.0037(15) 0.0014(15) 
O6 0.0130(13) 0.023(2) 0.0160(14) 0.0020(18) -0.0024(11) -0.0003(17) 
O1W 0.042(3) 0.020(3) 0.036(4) 0.000 0.022(3) 0.000 
O2W 0.048(3) 0.011(3) 0.038(3) 0.000 -0.031(3) 0.000 
 
_geom_special_details 
; 
 All esds (except the esd in the dihedral angle between two l.s. planes) 
 are estimated using the full covariance matrix.  The cell esds are taken 
 into account individually in the estimation of esds in distances, angles 
 and torsion angles; correlations between esds in cell parameters are only 
 used when they are defined by crystal symmetry.  An approximate (isotropic) 
 treatment of cell esds is used for estimating esds involving l.s. planes. 
; 
 
loop_ 
 _geom_bond_atom_site_label_1 
 _geom_bond_atom_site_label_2 
 _geom_bond_distance 
 _geom_bond_site_symmetry_2 
 _geom_bond_publ_flag 
K1 O1 2.773(5) 4_746 ? 
K1 O1 2.773(5) 3_445 ? 
K1 O4 2.825(4) . ? 
K1 O4 2.825(4) 2_757 ? 
K1 O6 2.828(4) 3 ? 
K1 O6 2.828(4) 4_656 ? 
K1 O3 2.919(4) . ? 
K1 O3 2.919(4) 2_757 ? 
K1 K2 3.684(2) 1_565 ? 
K1 I1 3.9593(19) 3_445 ? 
K1 I1 3.9593(19) 4_746 ? 
K1 I2 3.9785(18) . ? 
K2 O1 2.744(5) 3_445 ? 
K2 O1 2.744(5) 4_746 ? 
K2 O6 2.754(4) 4_646 ? 
K2 O6 2.754(4) 3_545 ? 
K2 O5 2.921(4) 2_757 ? 
K2 O5 2.921(4) . ? 
K2 O2 3.172(4) 3_445 ? 
K2 O2 3.172(4) 4_746 ? 
K2 K1 3.684(2) 1_545 ? 
K2 I1 3.8089(18) 3_445 ? 
K2 I1 3.8089(18) 4_746 ? 
K2 I2 3.9496(18) 2_757 ? 
Mn1 O2W 2.099(5) . ? 
Mn1 O1W 2.134(6) . ? 
Mn1 O2 2.170(3) 3_445 ? 
Mn1 O2 2.170(3) 4_646 ? 
Mn1 O5 2.236(4) 2_657 ? 
Mn1 O5 2.236(4) . ? 
I1 O3 1.797(3) . ? 
I1 O1 1.802(3) . ? 
I1 O2 1.830(4) . ? 
I1 K2 3.8089(18) 3_554 ? 
I1 K1 3.9593(19) 3_554 ? 
I2 O6 1.804(3) . ? 
I2 O4 1.814(4) . ? 
I2 O5 1.821(4) . ? 
I2 K1 4.0047(18) 3_444 ? 
I2 K2 4.0304(17) 3_454 ? 
O1 K2 2.744(4) 3_554 ? 
O1 K1 2.773(5) 3_554 ? 
O2 Mn1 2.170(3) 3_554 ? 
O2 K2 3.172(4) 3_554 ? 
O6 K2 2.754(4) 3_454 ? 
O6 K1 2.828(4) 3_444 ? 
O1W H1WA 0.8561 . ? 
O1W H1WB 0.8566 . ? 
O2W H2WA 0.8566 . ? 
O2W H2WB 0.8563 . ? 
 
loop_ 
 _geom_angle_atom_site_label_1 
 _geom_angle_atom_site_label_2 
 _geom_angle_atom_site_label_3 
 _geom_angle 
 _geom_angle_site_symmetry_1 
 _geom_angle_site_symmetry_3 
 _geom_angle_publ_flag 
O1 K1 O1 84.15(18) 4_746 3_445 ? 
O1 K1 O4 67.90(11) 4_746 . ? 
O1 K1 O4 92.99(11) 3_445 . ? 
O1 K1 O4 92.99(11) 4_746 2_757 ? 
O1 K1 O4 67.90(11) 3_445 2_757 ? 
O4 K1 O4 154.77(18) . 2_757 ? 
O1 K1 O6 158.41(9) 4_746 3 ? 
O1 K1 O6 93.81(11) 3_445 3 ? 
O4 K1 O6 133.69(11) . 3 ? 
O4 K1 O6 66.57(11) 2_757 3 ? 
O1 K1 O6 93.81(10) 4_746 4_656 ? 
O1 K1 O6 158.41(9) 3_445 4_656 ? 
O4 K1 O6 66.57(11) . 4_656 ? 
O4 K1 O6 133.69(12) 2_757 4_656 ? 
O6 K1 O6 95.69(17) 3 4_656 ? 
O1 K1 O3 76.08(11) 4_746 . ? 
O1 K1 O3 135.69(10) 3_445 . ? 
O4 K1 O3 114.62(11) . . ? 
O4 K1 O3 73.93(11) 2_757 . ? 
O6 K1 O3 90.92(10) 3 . ? 
O6 K1 O3 63.54(10) 4_656 . ? 
O1 K1 O3 135.69(11) 4_746 2_757 ? 
O1 K1 O3 76.08(11) 3_445 2_757 ? 
O4 K1 O3 73.93(11) . 2_757 ? 
O4 K1 O3 114.62(11) 2_757 2_757 ? 
O6 K1 O3 63.54(10) 3 2_757 ? 
O6 K1 O3 90.92(10) 4_656 2_757 ? 
O3 K1 O3 142.68(17) . 2_757 ? 
O1 K1 K2 137.93(9) 4_746 1_565 ? 
O1 K1 K2 137.93(9) 3_445 1_565 ? 
O4 K1 K2 102.61(9) . 1_565 ? 
O4 K1 K2 102.61(9) 2_757 1_565 ? 
O6 K1 K2 47.84(8) 3 1_565 ? 
O6 K1 K2 47.84(9) 4_656 1_565 ? 
O3 K1 K2 71.34(8) . 1_565 ? 
O3 K1 K2 71.34(8) 2_757 1_565 ? 
O1 K1 I1 95.63(10) 4_746 3_445 ? 
O1 K1 I1 23.62(6) 3_445 3_445 ? 
O4 K1 I1 78.32(9) . 3_445 ? 
O4 K1 I1 87.81(9) 2_757 3_445 ? 
O6 K1 I1 90.65(8) 3 3_445 ? 
O6 K1 I1 136.75(6) 4_656 3_445 ? 
O3 K1 I1 159.29(8) . 3_445 ? 
O3 K1 I1 54.36(8) 2_757 3_445 ? 
K2 K1 I1 123.44(3) 1_565 3_445 ? 
O1 K1 I1 23.62(6) 4_746 4_746 ? 
O1 K1 I1 95.63(10) 3_445 4_746 ? 
O4 K1 I1 87.81(9) . 4_746 ? 
O4 K1 I1 78.32(9) 2_757 4_746 ? 
O6 K1 I1 136.75(6) 3 4_746 ? 
O6 K1 I1 90.65(7) 4_656 4_746 ? 
O3 K1 I1 54.36(8) . 4_746 ? 
O3 K1 I1 159.29(8) 2_757 4_746 ? 
K2 K1 I1 123.44(3) 1_565 4_746 ? 
I1 K1 I1 113.12(7) 3_445 4_746 ? 
O1 K1 I2 44.00(6) 4_746 . ? 
O1 K1 I2 87.02(9) 3_445 . ? 
O4 K1 I2 24.10(8) . . ? 
O4 K1 I2 133.31(10) 2_757 . ? 
O6 K1 I2 157.55(7) 3 . ? 
O6 K1 I2 76.88(8) 4_656 . ? 
O3 K1 I2 104.11(7) . . ? 
O3 K1 I2 95.09(7) 2_757 . ? 
K2 K1 I2 121.30(3) 1_565 . ? 
I1 K1 I2 81.17(4) 3_445 . ? 
I1 K1 I2 65.22(4) 4_746 . ? 
O1 K2 O1 85.26(18) 3_445 4_746 ? 
O1 K2 O6 157.67(9) 3_445 4_646 ? 
O1 K2 O6 91.66(11) 4_746 4_646 ? 
O1 K2 O6 91.66(11) 3_445 3_545 ? 
O1 K2 O6 157.67(9) 4_746 3_545 ? 
O6 K2 O6 99.17(17) 4_646 3_545 ? 
O1 K2 O5 69.91(10) 3_445 2_757 ? 
O1 K2 O5 87.96(11) 4_746 2_757 ? 
O6 K2 O5 132.17(10) 4_646 2_757 ? 
O6 K2 O5 70.29(11) 3_545 2_757 ? 
O1 K2 O5 87.96(11) 3_445 . ? 
O1 K2 O5 69.91(10) 4_746 . ? 
O6 K2 O5 70.29(11) 4_646 . ? 
O6 K2 O5 132.17(10) 3_545 . ? 
O5 K2 O5 150.14(17) 2_757 . ? 
O1 K2 O2 54.56(10) 3_445 3_445 ? 
O1 K2 O2 113.38(11) 4_746 3_445 ? 
O6 K2 O2 107.50(10) 4_646 3_445 ? 
O6 K2 O2 81.98(10) 3_545 3_445 ? 
O5 K2 O2 116.37(10) 2_757 3_445 ? 
O5 K2 O2 59.45(10) . 3_445 ? 
O1 K2 O2 113.38(11) 3_445 4_746 ? 
O1 K2 O2 54.56(9) 4_746 4_746 ? 
O6 K2 O2 81.98(10) 4_646 4_746 ? 
O6 K2 O2 107.50(10) 3_545 4_746 ? 
O5 K2 O2 59.45(10) 2_757 4_746 ? 
O5 K2 O2 116.37(10) . 4_746 ? 
O2 K2 O2 165.71(16) 3_445 4_746 ? 
O1 K2 K1 137.37(9) 3_445 1_545 ? 
O1 K2 K1 137.37(9) 4_746 1_545 ? 
O6 K2 K1 49.59(8) 4_646 1_545 ? 
O6 K2 K1 49.59(8) 3_545 1_545 ? 
O5 K2 K1 104.93(8) 2_757 1_545 ? 
O5 K2 K1 104.93(8) . 1_545 ? 
O2 K2 K1 97.14(8) 3_445 1_545 ? 
O2 K2 K1 97.14(8) 4_746 1_545 ? 
O1 K2 I1 25.98(7) 3_445 3_445 ? 
O1 K2 I1 99.60(10) 4_746 3_445 ? 
O6 K2 I1 134.86(6) 4_646 3_445 ? 
O6 K2 I1 86.55(8) 3_545 3_445 ? 
O5 K2 I1 92.06(9) 2_757 3_445 ? 
O5 K2 I1 73.00(9) . 3_445 ? 
O2 K2 I1 28.58(7) 3_445 3_445 ? 
O2 K2 I1 138.97(9) 4_746 3_445 ? 
K1 K2 I1 119.84(3) 1_545 3_445 ? 
O1 K2 I1 99.60(10) 3_445 4_746 ? 
O1 K2 I1 25.98(7) 4_746 4_746 ? 
O6 K2 I1 86.55(8) 4_646 4_746 ? 
O6 K2 I1 134.86(6) 3_545 4_746 ? 
O5 K2 I1 73.00(9) 2_757 4_746 ? 
O5 K2 I1 92.06(9) . 4_746 ? 
O2 K2 I1 138.97(9) 3_445 4_746 ? 
O2 K2 I1 28.58(6) 4_746 4_746 ? 
K1 K2 I1 119.84(3) 1_545 4_746 ? 
I1 K2 I1 120.31(7) 3_445 4_746 ? 
O1 K2 I2 44.42(6) 3_445 2_757 ? 
O1 K2 I2 88.00(9) 4_746 2_757 ? 
O6 K2 I2 157.74(7) 4_646 2_757 ? 
O6 K2 I2 74.61(8) 3_545 2_757 ? 
O5 K2 I2 25.57(7) 2_757 2_757 ? 
O5 K2 I2 129.78(10) . 2_757 ? 
O2 K2 I2 92.97(7) 3_445 2_757 ? 
O2 K2 I2 79.72(7) 4_746 2_757 ? 
K1 K2 I2 120.60(3) 1_545 2_757 ? 
I1 K2 I2 66.89(4) 3_445 2_757 ? 
I1 K2 I2 83.44(4) 4_746 2_757 ? 
O2W Mn1 O1W 180.000(3) . . ? 
O2W Mn1 O2 86.63(11) . 3_445 ? 
O1W Mn1 O2 93.37(11) . 3_445 ? 
O2W Mn1 O2 86.63(11) . 4_646 ? 
O1W Mn1 O2 93.37(11) . 4_646 ? 
O2 Mn1 O2 173.3(2) 3_445 4_646 ? 
O2W Mn1 O5 95.91(10) . 2_657 ? 
O1W Mn1 O5 84.09(10) . 2_657 ? 
O2 Mn1 O5 93.84(15) 3_445 2_657 ? 
O2 Mn1 O5 86.85(15) 4_646 2_657 ? 
O2W Mn1 O5 95.91(10) . . ? 
O1W Mn1 O5 84.09(10) . . ? 
O2 Mn1 O5 86.85(15) 3_445 . ? 
O2 Mn1 O5 93.84(15) 4_646 . ? 
O5 Mn1 O5 168.2(2) 2_657 . ? 
O3 I1 O1 102.68(16) . . ? 
O3 I1 O2 97.88(16) . . ? 
O1 I1 O2 97.85(18) . . ? 
O3 I1 K2 105.75(13) . 3_554 ? 
O1 I1 K2 41.85(15) . 3_554 ? 
O2 I1 K2 56.01(11) . 3_554 ? 
O3 I1 K1 134.36(11) . 3_554 ? 
O1 I1 K1 38.08(14) . 3_554 ? 
O2 I1 K1 107.86(11) . 3_554 ? 
K2 I1 K1 63.29(4) 3_554 3_554 ? 
O3 I1 K1 39.80(11) . . ? 
O1 I1 K1 141.48(12) . . ? 
O2 I1 K1 83.23(12) . . ? 
K2 I1 K1 124.92(6) 3_554 . ? 
K1 I1 K1 168.86(5) 3_554 . ? 
O6 I2 O4 100.33(18) . . ? 
O6 I2 O5 101.72(17) . . ? 
O4 I2 O5 96.97(16) . . ? 
O6 I2 K2 144.73(14) . . ? 
O4 I2 K2 92.74(13) . . ? 
O5 I2 K2 43.80(12) . . ? 
O6 I2 K1 139.68(14) . . ? 
O4 I2 K1 39.48(12) . . ? 
O5 I2 K1 89.51(13) . . ? 
K2 I2 K1 61.90(4) . . ? 
O6 I2 K1 38.60(13) . 3_444 ? 
O4 I2 K1 138.82(12) . 3_444 ? 
O5 I2 K1 95.50(13) . 3_444 ? 
K2 I2 K1 122.41(6) . 3_444 ? 
K1 I2 K1 174.97(5) . 3_444 ? 
O6 I2 K2 34.97(12) . 3_454 ? 
O4 I2 K2 90.99(13) . 3_454 ? 
O5 I2 K2 136.59(12) . 3_454 ? 
K2 I2 K2 176.14(5) . 3_454 ? 
K1 I2 K2 121.00(6) . 3_454 ? 
K1 I2 K2 54.57(4) 3_444 3_454 ? 
I1 O1 K2 112.17(19) . 3_554 ? 
I1 O1 K1 118.30(18) . 3_554 ? 
K2 O1 K1 95.30(10) 3_554 3_554 ? 
I1 O2 Mn1 120.80(19) . 3_554 ? 
I1 O2 K2 95.41(13) . 3_554 ? 
Mn1 O2 K2 102.40(12) 3_554 3_554 ? 
I1 O3 K1 116.99(15) . . ? 
I2 O4 K1 116.42(17) . . ? 
I2 O5 Mn1 130.96(19) . . ? 
I2 O5 K2 110.63(15) . . ? 
Mn1 O5 K2 108.73(16) . . ? 
I2 O6 K2 122.97(17) . 3_454 ? 
I2 O6 K1 117.96(18) . 3_444 ? 
K2 O6 K1 82.57(9) 3_454 3_444 ? 
Mn1 O1W H1WA 109.4 . . ? 
Mn1 O1W H1WB 109.4 . . ? 
H1WA O1W H1WB 109.6 . . ? 
Mn1 O2W H2WA 109.4 . . ? 
Mn1 O2W H2WB 109.4 . . ? 
H2WA O2W H2WB 109.6 . . ? 
 
_diffrn_measured_fraction_theta_max    0.993 
_diffrn_reflns_theta_full              27.48 
_diffrn_measured_fraction_theta_full   0.993 
_refine_diff_density_max    0.607 
_refine_diff_density_min   -0.781 
_refine_diff_density_rms    0.133 

#===end

data_comp2 
 
_audit_creation_method            SHELXL-97 
_chemical_name_systematic 
; 
 ? 
; 
_chemical_name_common             ? 
_chemical_melting_point           ? 
_chemical_formula_moiety          ? 
_chemical_formula_sum 
 'H4 Co I4 K2 O14' 
_chemical_formula_weight          872.76 
 
loop_ 
 _atom_type_symbol 
 _atom_type_description 
 _atom_type_scat_dispersion_real 
 _atom_type_scat_dispersion_imag 
 _atom_type_scat_source 
 'O'  'O'   0.0106   0.0060 
 'International Tables Vol C Tables 4.2.6.8 and 6.1.1.4' 
 'H'  'H'   0.0000   0.0000 
 'International Tables Vol C Tables 4.2.6.8 and 6.1.1.4' 
 'K'  'K'   0.2009   0.2494 
 'International Tables Vol C Tables 4.2.6.8 and 6.1.1.4' 
 'Co'  'Co'   0.3494   0.9721 
 'International Tables Vol C Tables 4.2.6.8 and 6.1.1.4' 
 'I'  'I'  -0.4742   1.8119 
 'International Tables Vol C Tables 4.2.6.8 and 6.1.1.4' 
 
_symmetry_cell_setting            monoclinic
_symmetry_space_group_name_H-M    I2 
 
loop_ 
 _symmetry_equiv_pos_as_xyz 
 'x, y, z' 
 '-x, y, -z' 
 'x+1/2, y+1/2, z+1/2' 
 '-x+1/2, y+1/2, -z+1/2' 
 
_cell_length_a                    8.285(7) 
_cell_length_b                    7.738(3) 
_cell_length_c                    11.043(6) 
_cell_angle_alpha                 90.00 
_cell_angle_beta                  90.06(5) 
_cell_angle_gamma                 90.00 
_cell_volume                      708.0(7) 
_cell_formula_units_Z             2 
_cell_measurement_temperature     293(2) 
_cell_measurement_reflns_used     1132 
_cell_measurement_theta_min       3.0721 
_cell_measurement_theta_max       27.4487 
 
_exptl_crystal_description        'Prism' 
_exptl_crystal_colour             'red purple' 
_exptl_crystal_size_max           0.0800
_exptl_crystal_size_mid           0.0600 
_exptl_crystal_size_min           0.0400 
_exptl_crystal_density_meas       ? 
_exptl_crystal_density_diffrn     4.094 
_exptl_crystal_density_method     'not measured' 
_exptl_crystal_F_000              786 
_exptl_absorpt_coefficient_mu     10.589 
_exptl_absorpt_correction_type    'Multi-scan' 
_exptl_absorpt_correction_T_min   0.4849 
_exptl_absorpt_correction_T_max   1.0000 
_exptl_absorpt_process_details    ? 
 
_exptl_special_details 
; 
 ? 
; 
 
_diffrn_ambient_temperature       293(2) 
_diffrn_radiation_wavelength      0.71073 
_diffrn_radiation_type            MoK\a 
_diffrn_radiation_source          'fine-focus sealed tube' 
_diffrn_radiation_monochromator   graphite 
_diffrn_measurement_device_type   Mercury70 
_diffrn_measurement_method        'CCD_Profile_fitting' 
_diffrn_detector_area_resol_mean  14.6306 
_diffrn_standards_number          ? 
_diffrn_standards_interval_count  ? 
_diffrn_standards_interval_time   ? 
_diffrn_standards_decay_%         ? 
_diffrn_reflns_number             2790 
_diffrn_reflns_av_R_equivalents   0.0390 
_diffrn_reflns_av_sigmaI/netI     0.0607 
_diffrn_reflns_limit_h_min        -10 
_diffrn_reflns_limit_h_max        10 
_diffrn_reflns_limit_k_min        -10 
_diffrn_reflns_limit_k_max        7 
_diffrn_reflns_limit_l_min        -14 
_diffrn_reflns_limit_l_max        14 
_diffrn_reflns_theta_min          3.07 
_diffrn_reflns_theta_max          27.48 
_reflns_number_total              1497 
_reflns_number_gt                 1465 
_reflns_threshold_expression      >2sigma(I) 
 
_computing_data_collection        ? 
_computing_cell_refinement        ? 
_computing_data_reduction         ? 
_computing_structure_solution     'SHELXS-97 (Sheldrick, 1990)' 
_computing_structure_refinement   'SHELXL-97 (Sheldrick, 1997)' 
_computing_molecular_graphics     ? 
_computing_publication_material   ? 
 
_refine_special_details 
; 
 Refinement of F^2^ against ALL reflections.  The weighted R-factor wR and 
 goodness of fit S are based on F^2^, conventional R-factors R are based 
 on F, with F set to zero for negative F^2^. The threshold expression of 
 F^2^ > 2sigma(F^2^) is used only for calculating R-factors(gt) etc. and is 
 not relevant to the choice of reflections for refinement.  R-factors based 
 on F^2^ are statistically about twice as large as those based on F, and R- 
 factors based on ALL data will be even larger. 
; 
 
_refine_ls_structure_factor_coef  Fsqd  
_refine_ls_matrix_type            full 
_refine_ls_weighting_scheme       calc  
_refine_ls_weighting_details 
 'calc w=1/[\s^2^(Fo^2^)+(0.0243P)^2^+2.6402P] where P=(Fo^2^+2Fc^2^)/3' 
_atom_sites_solution_primary      direct 
_atom_sites_solution_secondary    difmap 
_atom_sites_solution_hydrogens    geom 
_refine_ls_hydrogen_treatment     none 
_refine_ls_extinction_method      SHELXL 
_refine_ls_extinction_coef        0.00094(13) 
_refine_ls_extinction_expression 
 'Fc^*^=kFc[1+0.001xFc^2^\l^3^/sin(2\q)]^-1/4^' 
_refine_ls_abs_structure_details 
 'Flack H D (1983), Acta Cryst. A39, 876-881' 
_refine_ls_abs_structure_Flack    0.00 
_refine_ls_number_reflns          1497 
_refine_ls_number_parameters      102 
_refine_ls_number_restraints      1 
_refine_ls_R_factor_all           0.0367 
_refine_ls_R_factor_gt            0.0355 
_refine_ls_wR_factor_ref          0.0736 
_refine_ls_wR_factor_gt           0.0722 
_refine_ls_goodness_of_fit_ref    1.077 
_refine_ls_restrained_S_all       1.077 
_refine_ls_shift/su_max           0.000 
_refine_ls_shift/su_mean          0.000 
 
loop_ 
 _atom_site_label 
 _atom_site_type_symbol 
 _atom_site_fract_x 
 _atom_site_fract_y 
 _atom_site_fract_z 
 _atom_site_U_iso_or_equiv 
 _atom_site_adp_type 
 _atom_site_occupancy 
 _atom_site_symmetry_multiplicity 
 _atom_site_calc_flag 
 _atom_site_refinement_flags 
 _atom_site_disorder_assembly 
 _atom_site_disorder_group 
K1 K 0.0000 -0.8711(9) 0.0000 0.0233(17) Uani 1 2 d S . . 
K2 K 0.0000 -0.3434(11) 0.0000 0.031(2) Uani 1 2 d S . . 
Co1 Co 0.5000 -0.4165(6) 0.0000 0.0171(7) Uani 1 2 d S . . 
I1 I -0.23899(10) -1.09191(16) 0.27865(6) 0.0134(2) Uani 1 1 d . . . 
I2 I 0.25183(12) -0.60150(18) 0.23854(6) 0.0160(3) Uani 1 1 d . . . 
O1 O -0.4379(9) -1.107(2) 0.3435(9) 0.022(2) Uani 1 1 d . . . 
O2 O -0.1702(11) -0.9007(15) 0.3581(8) 0.016(2) Uani 1 1 d . . . 
O3 O -0.2803(11) -0.9955(13) 0.1354(8) 0.020(2) Uani 1 1 d . . . 
O4 O 0.2678(13) -0.789(2) 0.1457(11) 0.022(3) Uani 1 1 d . . . 
O5 O 0.2964(13) -0.4314(15) 0.1217(11) 0.017(3) Uani 1 1 d . . . 
O6 O 0.4409(10) -0.6155(17) 0.3181(8) 0.020(2) Uani 1 1 d . . . 
O1W O 0.5000 -0.688(2) 0.0000 0.022(4) Uani 1 2 d S . . 
H1WA H 0.5749 -0.7245 -0.0457 0.033 Uiso 0.50 1 d PR . . 
H1WB H 0.4096 -0.7245 -0.0258 0.033 Uiso 0.50 1 d PR . . 
O2W O 0.5000 -0.1540(15) 0.0000 0.035(5) Uani 1 2 d S . . 
H2WA H 0.4096 -0.1174 -0.0258 0.052 Uiso 0.50 1 d PR . . 
H2WB H 0.5156 -0.1174 0.0714 0.052 Uiso 0.50 1 d PR . . 
 
loop_ 
 _atom_site_aniso_label 
 _atom_site_aniso_U_11 
 _atom_site_aniso_U_22 
 _atom_site_aniso_U_33 
 _atom_site_aniso_U_23 
 _atom_site_aniso_U_13 
 _atom_site_aniso_U_12 
K1 0.027(3) 0.016(4) 0.027(4) 0.000 -0.010(3) 0.000 
K2 0.033(4) 0.035(5) 0.023(4) 0.000 0.002(5) 0.000 
Co1 0.0134(13) 0.0201(18) 0.0179(15) 0.000 -0.0017(19) 0.000 
I1 0.0131(3) 0.0133(5) 0.0139(3) 0.0008(6) -0.0001(4) 0.0002(7) 
I2 0.0130(4) 0.0190(6) 0.0161(4) -0.0038(9) 0.0005(5) 0.0017(9) 
O1 0.011(4) 0.024(6) 0.031(5) 0.018(8) 0.002(3) 0.008(6) 
O2 0.016(4) 0.011(6) 0.022(5) -0.004(5) -0.004(4) -0.001(4) 
O3 0.022(5) 0.018(5) 0.020(5) 0.008(4) -0.008(5) -0.014(4) 
O4 0.020(6) 0.030(6) 0.017(6) -0.003(5) 0.001(6) -0.012(6) 
O5 0.014(6) 0.032(7) 0.006(5) 0.009(5) 0.005(4) 0.000(5) 
O6 0.023(4) 0.011(6) 0.026(5) -0.002(6) -0.010(4) -0.007(5) 
O1W 0.035(8) 0.023(8) 0.008(7) 0.000 0.015(7) 0.000 
O2W 0.052(10) 0.009(9) 0.044(10) 0.000 -0.042(9) 0.000 
 
_geom_special_details 
; 
 All esds (except the esd in the dihedral angle between two l.s. planes) 
 are estimated using the full covariance matrix.  The cell esds are taken 
 into account individually in the estimation of esds in distances, angles 
 and torsion angles; correlations between esds in cell parameters are only 
 used when they are defined by crystal symmetry.  An approximate (isotropic) 
 treatment of cell esds is used for estimating esds involving l.s. planes. 
; 
 
loop_ 
 _geom_bond_atom_site_label_1 
 _geom_bond_atom_site_label_2 
 _geom_bond_distance 
 _geom_bond_site_symmetry_2 
 _geom_bond_publ_flag 
K1 O1 2.726(14) 4_455 ? 
K1 O1 2.726(14) 3_554 ? 
K1 O6 2.801(12) 3_444 ? 
K1 O6 2.801(12) 4_545 ? 
K1 O4 2.811(12) . ? 
K1 O4 2.811(12) 2 ? 
K1 O3 2.926(10) . ? 
K1 O3 2.926(10) 2 ? 
K1 K2 3.655(7) 1_545 ? 
K1 I1 3.915(4) 4_455 ? 
K1 I1 3.915(4) 3_554 ? 
K1 I2 3.954(4) . ? 
K2 O6 2.717(11) 4 ? 
K2 O6 2.717(11) 3_454 ? 
K2 O1 2.724(15) 3_554 ? 
K2 O1 2.724(15) 4_455 ? 
K2 O5 2.880(12) 2 ? 
K2 O5 2.880(12) . ? 
K2 O2 3.182(10) 4_455 ? 
K2 O2 3.182(10) 3_554 ? 
K2 K1 3.655(7) 1_565 ? 
K2 I1 3.790(5) 4_455 ? 
K2 I1 3.790(5) 3_554 ? 
K2 I2 3.908(5) 2 ? 
Co1 O2W 2.031(13) . ? 
Co1 O1W 2.100(18) . ? 
Co1 O2 2.110(9) 4 ? 
Co1 O2 2.110(9) 3_554 ? 
Co1 O5 2.161(11) . ? 
Co1 O5 2.161(11) 2_655 ? 
I1 O3 1.782(9) . ? 
I1 O1 1.801(8) . ? 
I1 O2 1.812(10) . ? 
I1 K2 3.790(5) 3_445 ? 
I1 K1 3.915(4) 3_445 ? 
I2 O4 1.784(14) . ? 
I2 O6 1.799(8) . ? 
I2 O5 1.880(11) . ? 
I2 K1 3.966(4) 3 ? 
I2 K2 4.007(4) 3_545 ? 
O1 K2 2.724(15) 3_445 ? 
O1 K1 2.726(14) 3_445 ? 
O2 Co1 2.110(9) 3_445 ? 
O2 K2 3.182(10) 3_445 ? 
O6 K2 2.717(11) 3_545 ? 
O6 K1 2.801(12) 3 ? 
 
loop_ 
 _geom_angle_atom_site_label_1 
 _geom_angle_atom_site_label_2 
 _geom_angle_atom_site_label_3 
 _geom_angle 
 _geom_angle_site_symmetry_1 
 _geom_angle_site_symmetry_3 
 _geom_angle_publ_flag 
O1 K1 O1 82.9(6) 4_455 3_554 ? 
O1 K1 O6 158.1(3) 4_455 3_444 ? 
O1 K1 O6 94.8(3) 3_554 3_444 ? 
O1 K1 O6 94.8(3) 4_455 4_545 ? 
O1 K1 O6 158.1(3) 3_554 4_545 ? 
O6 K1 O6 95.1(5) 3_444 4_545 ? 
O1 K1 O4 67.5(4) 4_455 . ? 
O1 K1 O4 92.6(4) 3_554 . ? 
O6 K1 O4 134.4(4) 3_444 . ? 
O6 K1 O4 66.7(4) 4_545 . ? 
O1 K1 O4 92.6(4) 4_455 2 ? 
O1 K1 O4 67.5(4) 3_554 2 ? 
O6 K1 O4 66.7(4) 3_444 2 ? 
O6 K1 O4 134.4(4) 4_545 2 ? 
O4 K1 O4 154.0(7) . 2 ? 
O1 K1 O3 76.8(3) 4_455 . ? 
O1 K1 O3 136.2(3) 3_554 . ? 
O6 K1 O3 90.3(3) 3_444 . ? 
O6 K1 O3 63.2(3) 4_545 . ? 
O4 K1 O3 114.1(3) . . ? 
O4 K1 O3 74.9(3) 2 . ? 
O1 K1 O3 136.2(3) 4_455 2 ? 
O1 K1 O3 76.8(3) 3_554 2 ? 
O6 K1 O3 63.2(3) 3_444 2 ? 
O6 K1 O3 90.3(3) 4_545 2 ? 
O4 K1 O3 74.9(3) . 2 ? 
O4 K1 O3 114.1(3) 2 2 ? 
O3 K1 O3 141.6(5) . 2 ? 
O1 K1 K2 138.6(3) 4_455 1_545 ? 
O1 K1 K2 138.6(3) 3_554 1_545 ? 
O6 K1 K2 47.5(3) 3_444 1_545 ? 
O6 K1 K2 47.5(3) 4_545 1_545 ? 
O4 K1 K2 103.0(3) . 1_545 ? 
O4 K1 K2 103.0(3) 2 1_545 ? 
O3 K1 K2 70.8(2) . 1_545 ? 
O3 K1 K2 70.8(2) 2 1_545 ? 
O1 K1 I1 23.89(19) 4_455 4_455 ? 
O1 K1 I1 95.0(3) 3_554 4_455 ? 
O6 K1 I1 136.37(18) 3_444 4_455 ? 
O6 K1 I1 91.2(2) 4_545 4_455 ? 
O4 K1 I1 87.4(3) . 4_455 ? 
O4 K1 I1 78.3(3) 2 4_455 ? 
O3 K1 I1 54.8(2) . 4_455 ? 
O3 K1 I1 160.0(2) 2 4_455 ? 
K2 K1 I1 123.49(9) 1_545 4_455 ? 
O1 K1 I1 95.0(3) 4_455 3_554 ? 
O1 K1 I1 23.89(19) 3_554 3_554 ? 
O6 K1 I1 91.2(2) 3_444 3_554 ? 
O6 K1 I1 136.37(18) 4_545 3_554 ? 
O4 K1 I1 78.3(3) . 3_554 ? 
O4 K1 I1 87.4(3) 2 3_554 ? 
O3 K1 I1 160.0(2) . 3_554 ? 
O3 K1 I1 54.8(2) 2 3_554 ? 
K2 K1 I1 123.49(9) 1_545 3_554 ? 
I1 K1 I1 113.02(19) 4_455 3_554 ? 
O1 K1 I2 44.10(17) 4_455 . ? 
O1 K1 I2 85.8(3) 3_554 . ? 
O6 K1 I2 157.75(19) 3_444 . ? 
O6 K1 I2 77.7(2) 4_545 . ? 
O4 K1 I2 23.7(3) . . ? 
O4 K1 I2 132.7(4) 2 . ? 
O3 K1 I2 104.58(18) . . ? 
O3 K1 I2 95.48(19) 2 . ? 
K2 K1 I2 121.85(9) 1_545 . ? 
I1 K1 I2 65.44(9) 4_455 . ? 
I1 K1 I2 80.41(11) 3_554 . ? 
O6 K2 O6 99.1(5) 4 3_454 ? 
O6 K2 O1 157.1(3) 4 3_554 ? 
O6 K2 O1 92.9(3) 3_454 3_554 ? 
O6 K2 O1 92.9(3) 4 4_455 ? 
O6 K2 O1 157.1(3) 3_454 4_455 ? 
O1 K2 O1 83.0(6) 3_554 4_455 ? 
O6 K2 O5 130.7(3) 4 2 ? 
O6 K2 O5 69.9(3) 3_454 2 ? 
O1 K2 O5 71.8(3) 3_554 2 ? 
O1 K2 O5 87.5(3) 4_455 2 ? 
O6 K2 O5 69.9(3) 4 . ? 
O6 K2 O5 130.7(3) 3_454 . ? 
O1 K2 O5 87.5(3) 3_554 . ? 
O1 K2 O5 71.8(3) 4_455 . ? 
O5 K2 O5 152.6(5) 2 . ? 
O6 K2 O2 83.1(3) 4 4_455 ? 
O6 K2 O2 107.5(3) 3_454 4_455 ? 
O1 K2 O2 111.8(4) 3_554 4_455 ? 
O1 K2 O2 54.6(3) 4_455 4_455 ? 
O5 K2 O2 57.6(3) 2 4_455 ? 
O5 K2 O2 118.0(3) . 4_455 ? 
O6 K2 O2 107.5(3) 4 3_554 ? 
O6 K2 O2 83.1(3) 3_454 3_554 ? 
O1 K2 O2 54.6(3) 3_554 3_554 ? 
O1 K2 O2 111.8(4) 4_455 3_554 ? 
O5 K2 O2 118.0(3) 2 3_554 ? 
O5 K2 O2 57.6(3) . 3_554 ? 
O2 K2 O2 164.0(5) 4_455 3_554 ? 
O6 K2 K1 49.5(3) 4 1_565 ? 
O6 K2 K1 49.5(3) 3_454 1_565 ? 
O1 K2 K1 138.5(3) 3_554 1_565 ? 
O1 K2 K1 138.5(3) 4_455 1_565 ? 
O5 K2 K1 103.7(3) 2 1_565 ? 
O5 K2 K1 103.7(3) . 1_565 ? 
O2 K2 K1 98.0(2) 4_455 1_565 ? 
O2 K2 K1 98.0(2) 3_554 1_565 ? 
O6 K2 I1 87.4(2) 4 4_455 ? 
O6 K2 I1 134.72(19) 3_454 4_455 ? 
O1 K2 I1 97.9(3) 3_554 4_455 ? 
O1 K2 I1 26.1(2) 4_455 4_455 ? 
O5 K2 I1 72.2(2) 2 4_455 ? 
O5 K2 I1 93.8(2) . 4_455 ? 
O2 K2 I1 28.46(19) 4_455 4_455 ? 
O2 K2 I1 137.5(3) 3_554 4_455 ? 
K1 K2 I1 120.50(11) 1_565 4_455 ? 
O6 K2 I1 134.72(18) 4 3_554 ? 
O6 K2 I1 87.4(2) 3_454 3_554 ? 
O1 K2 I1 26.1(2) 3_554 3_554 ? 
O1 K2 I1 97.9(3) 4_455 3_554 ? 
O5 K2 I1 93.8(2) 2 3_554 ? 
O5 K2 I1 72.2(2) . 3_554 ? 
O2 K2 I1 137.5(3) 4_455 3_554 ? 
O2 K2 I1 28.46(19) 3_554 3_554 ? 
K1 K2 I1 120.50(11) 1_565 3_554 ? 
I1 K2 I1 119.0(2) 4_455 3_554 ? 
O6 K2 I2 157.8(2) 4 2 ? 
O6 K2 I2 74.8(2) 3_454 2 ? 
O1 K2 I2 44.80(17) 3_554 2 ? 
O1 K2 I2 86.8(3) 4_455 2 ? 
O5 K2 I2 27.1(2) 2 2 ? 
O5 K2 I2 130.4(3) . 2 ? 
O2 K2 I2 78.6(2) 4_455 2 ? 
O2 K2 I2 93.2(2) 3_554 2 ? 
K1 K2 I2 120.74(11) 1_565 2 ? 
I1 K2 I2 82.57(12) 4_455 2 ? 
I1 K2 I2 67.07(10) 3_554 2 ? 
O2W Co1 O1W 180.000(1) . . ? 
O2W Co1 O2 86.7(3) . 4 ? 
O1W Co1 O2 93.3(3) . 4 ? 
O2W Co1 O2 86.7(3) . 3_554 ? 
O1W Co1 O2 93.3(3) . 3_554 ? 
O2 Co1 O2 173.4(7) 4 3_554 ? 
O2W Co1 O5 93.1(3) . . ? 
O1W Co1 O5 86.9(3) . . ? 
O2 Co1 O5 93.6(4) 4 . ? 
O2 Co1 O5 86.7(4) 3_554 . ? 
O2W Co1 O5 93.1(3) . 2_655 ? 
O1W Co1 O5 86.9(3) . 2_655 ? 
O2 Co1 O5 86.7(4) 4 2_655 ? 
O2 Co1 O5 93.6(4) 3_554 2_655 ? 
O5 Co1 O5 173.9(6) . 2_655 ? 
O3 I1 O1 101.8(4) . . ? 
O3 I1 O2 98.5(4) . . ? 
O1 I1 O2 98.5(6) . . ? 
O3 I1 K2 104.6(4) . 3_445 ? 
O1 I1 K2 41.7(5) . 3_445 ? 
O2 I1 K2 56.8(3) . 3_445 ? 
O3 I1 K1 132.8(3) . 3_445 ? 
O1 I1 K1 37.8(4) . 3_445 ? 
O2 I1 K1 108.8(3) . 3_445 ? 
K2 I1 K1 63.99(9) 3_445 3_445 ? 
O3 I1 K1 40.6(3) . . ? 
O1 I1 K1 141.2(4) . . ? 
O2 I1 K1 82.5(3) . . ? 
K2 I1 K1 123.86(19) 3_445 . ? 
K1 I1 K1 168.62(14) 3_445 . ? 
O4 I2 O6 99.6(6) . . ? 
O4 I2 O5 99.3(5) . . ? 
O6 I2 O5 101.9(5) . . ? 
O4 I2 K2 94.0(5) . . ? 
O6 I2 K2 145.5(4) . . ? 
O5 I2 K2 44.3(3) . . ? 
O4 I2 K1 39.3(4) . . ? 
O6 I2 K1 138.8(4) . . ? 
O5 I2 K1 90.9(4) . . ? 
K2 I2 K1 62.59(9) . . ? 
O4 I2 K1 138.2(4) . 3 ? 
O6 I2 K1 38.8(4) . 3 ? 
O5 I2 K1 94.8(4) . 3 ? 
K2 I2 K1 122.48(19) . 3 ? 
K1 I2 K1 174.27(16) . 3 ? 
O4 I2 K2 89.7(4) . 3_545 ? 
O6 I2 K2 34.3(4) . 3_545 ? 
O5 I2 K2 136.1(3) . 3_545 ? 
K2 I2 K2 176.14(16) . 3_545 ? 
K1 I2 K2 120.24(18) . 3_545 ? 
K1 I2 K2 54.56(9) 3 3_545 ? 
I1 O1 K2 112.2(6) . 3_445 ? 
I1 O1 K1 118.3(6) . 3_445 ? 
K2 O1 K1 97.1(3) 3_445 3_445 ? 
I1 O2 Co1 121.5(6) . 3_445 ? 
I1 O2 K2 94.7(4) . 3_445 ? 
Co1 O2 K2 102.5(3) 3_445 3_445 ? 
I1 O3 K1 116.1(4) . . ? 
I2 O4 K1 116.9(6) . . ? 
I2 O5 Co1 128.2(6) . . ? 
I2 O5 K2 108.5(4) . . ? 
Co1 O5 K2 111.3(5) . . ? 
I2 O6 K2 123.8(5) . 3_545 ? 
I2 O6 K1 117.5(6) . 3 ? 
K2 O6 K1 82.9(3) 3_545 3 ? 
 
_diffrn_measured_fraction_theta_max    0.999 
_diffrn_reflns_theta_full              27.48 
_diffrn_measured_fraction_theta_full   0.999 
_refine_diff_density_max    1.994 
_refine_diff_density_min   -1.494 
_refine_diff_density_rms    0.270 

#===end

data_comp3 
 
_audit_creation_method            SHELXL-97 
_chemical_name_systematic 
; 
 ? 
; 
_chemical_name_common             ? 
_chemical_melting_point           ? 
_chemical_formula_moiety          ? 
_chemical_formula_sum 
 'H4 I4 K2 O14 Zn' 
_chemical_formula_weight          879.20 
 
loop_ 
 _atom_type_symbol 
 _atom_type_description 
 _atom_type_scat_dispersion_real 
 _atom_type_scat_dispersion_imag 
 _atom_type_scat_source 
 'O'  'O'   0.0106   0.0060 
 'International Tables Vol C Tables 4.2.6.8 and 6.1.1.4' 
 'H'  'H'   0.0000   0.0000 
 'International Tables Vol C Tables 4.2.6.8 and 6.1.1.4' 
 'K'  'K'   0.2009   0.2494 
 'International Tables Vol C Tables 4.2.6.8 and 6.1.1.4' 
 'Zn'  'Zn'   0.2839   1.4301 
 'International Tables Vol C Tables 4.2.6.8 and 6.1.1.4' 
 'I'  'I'  -0.4742   1.8119 
 'International Tables Vol C Tables 4.2.6.8 and 6.1.1.4' 
 
_symmetry_cell_setting            monoclinic 
_symmetry_space_group_name_H-M    I2 
 
loop_ 
 _symmetry_equiv_pos_as_xyz 
 'x, y, z' 
 '-x, y, -z' 
 'x+1/2, y+1/2, z+1/2' 
 '-x+1/2, y+1/2, -z+1/2' 
 
_cell_length_a                    8.289(4) 
_cell_length_b                    7.733(8) 
_cell_length_c                    11.080(12) 
_cell_angle_alpha                 90.00 
_cell_angle_beta                  90.12(3) 
_cell_angle_gamma                 90.00 
_cell_volume                      710.2(11) 
_cell_formula_units_Z             2 
_cell_measurement_temperature     293(2) 
_cell_measurement_reflns_used     526 
_cell_measurement_theta_min       3.0659 
_cell_measurement_theta_max       27.4642 
 
_exptl_crystal_description        'Prism' 
_exptl_crystal_colour             'Colorless' 
_exptl_crystal_size_max           0.2000
_exptl_crystal_size_mid           0.2000 
_exptl_crystal_size_min           0.2000 
_exptl_crystal_density_meas       ? 
_exptl_crystal_density_diffrn     4.111 
_exptl_crystal_density_method     'not measured' 
_exptl_crystal_F_000              792 
_exptl_absorpt_coefficient_mu     11.078 
_exptl_absorpt_correction_type    'Multi-scan' 
_exptl_absorpt_correction_T_min   0.5671
_exptl_absorpt_correction_T_max   1.0000 
_exptl_absorpt_process_details    ? 
 
_exptl_special_details 
; 
 ? 
; 
 
_diffrn_ambient_temperature       293(2) 
_diffrn_radiation_wavelength      0.71073 
_diffrn_radiation_type            MoK\a 
_diffrn_radiation_source          'fine-focus sealed tube' 
_diffrn_radiation_monochromator   graphite 
_diffrn_measurement_device_type   Mercury2 
_diffrn_measurement_method        'CCD_Profile_fitting' 
_diffrn_detector_area_resol_mean  13.6612
_diffrn_standards_number          ? 
_diffrn_standards_interval_count  ? 
_diffrn_standards_interval_time   ? 
_diffrn_standards_decay_%         ? 
_diffrn_reflns_number             2626 
_diffrn_reflns_av_R_equivalents   0.0308 
_diffrn_reflns_av_sigmaI/netI     0.0324 
_diffrn_reflns_limit_h_min        -10 
_diffrn_reflns_limit_h_max        10 
_diffrn_reflns_limit_k_min        -10 
_diffrn_reflns_limit_k_max        6 
_diffrn_reflns_limit_l_min        -14 
_diffrn_reflns_limit_l_max        14 
_diffrn_reflns_theta_min          3.21 
_diffrn_reflns_theta_max          27.44 
_reflns_number_total              1193 
_reflns_number_gt                 1186 
_reflns_threshold_expression      >2sigma(I) 
 
_computing_data_collection        ? 
_computing_cell_refinement        ? 
_computing_data_reduction         ? 
_computing_structure_solution     'SHELXS-97 (Sheldrick, 1990)' 
_computing_structure_refinement   'SHELXL-97 (Sheldrick, 1997)' 
_computing_molecular_graphics     ? 
_computing_publication_material   ? 
 
_refine_special_details 
; 
 Refinement of F^2^ against ALL reflections.  The weighted R-factor wR and 
 goodness of fit S are based on F^2^, conventional R-factors R are based 
 on F, with F set to zero for negative F^2^. The threshold expression of 
 F^2^ > 2sigma(F^2^) is used only for calculating R-factors(gt) etc. and is 
 not relevant to the choice of reflections for refinement.  R-factors based 
 on F^2^ are statistically about twice as large as those based on F, and R- 
 factors based on ALL data will be even larger. 
; 
 
_refine_ls_structure_factor_coef  Fsqd  
_refine_ls_matrix_type            full 
_refine_ls_weighting_scheme       calc  
_refine_ls_weighting_details 
 'calc w=1/[\s^2^(Fo^2^)+(0.0254P)^2^+0.0000P] where P=(Fo^2^+2Fc^2^)/3' 
_atom_sites_solution_primary      direct 
_atom_sites_solution_secondary    difmap 
_atom_sites_solution_hydrogens    geom 
_refine_ls_hydrogen_treatment     none 
_refine_ls_extinction_method      SHELXL 
_refine_ls_extinction_coef        0.0057(3) 
_refine_ls_extinction_expression 
 'Fc^*^=kFc[1+0.001xFc^2^\l^3^/sin(2\q)]^-1/4^' 
_refine_ls_abs_structure_details 
 'Flack H D (1983), Acta Cryst. A39, 876-881' 
_refine_ls_abs_structure_Flack    0.04(4) 
_refine_ls_number_reflns          1193 
_refine_ls_number_parameters      100 
_refine_ls_number_restraints      1 
_refine_ls_R_factor_all           0.0200 
_refine_ls_R_factor_gt            0.0200 
_refine_ls_wR_factor_ref          0.0453 
_refine_ls_wR_factor_gt           0.0453 
_refine_ls_goodness_of_fit_ref    1.066 
_refine_ls_restrained_S_all       1.065 
_refine_ls_shift/su_max           0.000 
_refine_ls_shift/su_mean          0.000 
 
loop_ 
 _atom_site_label 
 _atom_site_type_symbol 
 _atom_site_fract_x 
 _atom_site_fract_y 
 _atom_site_fract_z 
 _atom_site_U_iso_or_equiv 
 _atom_site_adp_type 
 _atom_site_occupancy 
 _atom_site_symmetry_multiplicity 
 _atom_site_calc_flag 
 _atom_site_refinement_flags 
 _atom_site_disorder_assembly 
 _atom_site_disorder_group 
K1 K 0.0000 -0.8714(5) 0.0000 0.0183(8) Uani 1 2 d S . . 
K2 K 0.0000 -0.3423(6) 0.0000 0.0204(8) Uani 1 2 d S . . 
Zn1 Zn 0.5000 -0.4161(3) 0.0000 0.0139(3) Uani 1 2 d S . . 
I1 I -0.23907(6) -1.09112(8) 0.27879(4) 0.01097(13) Uani 1 1 d . . . 
I2 I 0.25225(7) -0.60232(9) 0.23821(4) 0.01147(13) Uani 1 1 d . . . 
O1 O -0.4377(6) -1.1044(12) 0.3439(5) 0.0195(12) Uani 1 1 d . . . 
O2 O -0.1703(7) -0.8954(8) 0.3586(5) 0.0165(13) Uani 1 1 d . . . 
O3 O -0.2816(7) -0.9918(8) 0.1363(5) 0.0181(14) Uani 1 1 d . . . 
O4 O 0.2710(6) -0.7905(9) 0.1416(6) 0.0154(14) Uani 1 1 d . . . 
O5 O 0.2947(7) -0.4380(8) 0.1252(6) 0.0155(15) Uani 1 1 d . . . 
O6 O 0.4426(6) -0.6129(10) 0.3181(5) 0.0154(12) Uani 1 1 d . . . 
O1W O 0.5000 -0.6840(14) 0.0000 0.030(2) Uani 1 2 d S . . 
H1WA H 0.5749 -0.7207 -0.0457 0.045 Uiso 0.50 1 d PR . . 
H1WB H 0.4096 -0.7207 -0.0258 0.045 Uiso 0.50 1 d PR . . 
O2W O 0.5000 -0.1551(12) 0.0000 0.036(3) Uani 1 2 d S . . 
H2WA H 0.4096 -0.1185 -0.0258 0.054 Uiso 0.50 1 d PR . . 
H2WB H 0.5156 -0.1185 0.0714 0.054 Uiso 0.50 1 d PR . . 
 
loop_ 
 _atom_site_aniso_label 
 _atom_site_aniso_U_11 
 _atom_site_aniso_U_22 
 _atom_site_aniso_U_33 
 _atom_site_aniso_U_23 
 _atom_site_aniso_U_13 
 _atom_site_aniso_U_12 
K1 0.0216(14) 0.0162(19) 0.0170(17) 0.000 -0.0019(15) 0.000 
K2 0.0301(17) 0.0143(15) 0.0168(15) 0.000 -0.001(2) 0.000 
Zn1 0.0163(6) 0.0094(6) 0.0161(8) 0.000 -0.0032(8) 0.000 
I1 0.01081(19) 0.0093(3) 0.0128(2) 0.0000(3) 0.0010(2) -0.0006(3) 
I2 0.0102(2) 0.0125(3) 0.0117(2) 0.0006(4) 0.0017(3) 0.0000(4) 
O1 0.013(2) 0.022(3) 0.023(3) -0.007(4) 0.003(2) 0.003(3) 
O2 0.017(3) 0.010(3) 0.022(3) -0.007(3) -0.006(2) 0.000(3) 
O3 0.024(3) 0.016(3) 0.014(3) 0.005(2) -0.007(3) -0.005(2) 
O4 0.019(3) 0.013(3) 0.015(3) -0.006(3) 0.003(3) -0.004(3) 
O5 0.018(3) 0.012(3) 0.017(3) 0.000(3) 0.007(3) 0.006(2) 
O6 0.0114(19) 0.018(3) 0.017(3) 0.004(4) -0.002(2) 0.000(3) 
O1W 0.029(4) 0.023(5) 0.038(7) 0.000 0.022(5) 0.000 
O2W 0.055(6) 0.011(5) 0.042(7) 0.000 -0.029(6) 0.000 
 
_geom_special_details 
; 
 All esds (except the esd in the dihedral angle between two l.s. planes) 
 are estimated using the full covariance matrix.  The cell esds are taken 
 into account individually in the estimation of esds in distances, angles 
 and torsion angles; correlations between esds in cell parameters are only 
 used when they are defined by crystal symmetry.  An approximate (isotropic) 
 treatment of cell esds is used for estimating esds involving l.s. planes. 
; 
 
loop_ 
 _geom_bond_atom_site_label_1 
 _geom_bond_atom_site_label_2 
 _geom_bond_distance 
 _geom_bond_site_symmetry_2 
 _geom_bond_publ_flag 
K1 O1 2.743(9) 4_455 ? 
K1 O1 2.743(9) 3_554 ? 
K1 O6 2.787(7) 3_444 ? 
K1 O6 2.787(7) 4_545 ? 
K1 O4 2.808(6) . ? 
K1 O4 2.808(6) 2 ? 
K1 O3 2.934(6) 2 ? 
K1 O3 2.934(6) . ? 
K1 K2 3.641(5) 1_545 ? 
K1 I1 3.925(3) 4_455 ? 
K1 I1 3.925(3) 3_554 ? 
K1 I2 3.956(3) . ? 
K2 O1 2.715(8) 3_554 ? 
K2 O1 2.715(8) 4_455 ? 
K2 O6 2.726(7) 4 ? 
K2 O6 2.726(7) 3_454 ? 
K2 O5 2.903(7) 2 ? 
K2 O5 2.903(7) . ? 
K2 O2 3.180(6) 3_554 ? 
K2 O2 3.180(6) 4_455 ? 
K2 K1 3.641(5) 1_565 ? 
K2 I1 3.796(3) 3_554 ? 
K2 I1 3.796(3) 4_455 ? 
K2 I2 3.919(3) 2 ? 
Zn1 O2W 2.018(9) . ? 
Zn1 O1W 2.072(12) . ? 
Zn1 O2 2.113(6) 4 ? 
Zn1 O2 2.113(6) 3_554 ? 
Zn1 O5 2.204(6) 2_655 ? 
Zn1 O5 2.204(6) . ? 
I1 O3 1.790(6) . ? 
I1 O1 1.802(5) . ? 
I1 O2 1.842(6) . ? 
I1 K2 3.796(3) 3_445 ? 
I1 K1 3.925(3) 3_445 ? 
I2 O6 1.810(5) . ? 
I2 O4 1.814(7) . ? 
I2 O5 1.819(7) . ? 
I2 K1 3.974(3) 3 ? 
I2 K2 4.006(3) 3_545 ? 
O1 K2 2.715(8) 3_445 ? 
O1 K1 2.743(9) 3_445 ? 
O2 Zn1 2.113(6) 3_445 ? 
O2 K2 3.180(6) 3_445 ? 
O6 K2 2.726(7) 3_545 ? 
O6 K1 2.787(7) 3 ? 
O1W H1WA 0.8500 . ? 
O1W H1WB 0.8500 . ? 
O2W H2WA 0.8500 . ? 
O2W H2WB 0.8500 . ? 
 
loop_ 
 _geom_angle_atom_site_label_1 
 _geom_angle_atom_site_label_2 
 _geom_angle_atom_site_label_3 
 _geom_angle 
 _geom_angle_site_symmetry_1 
 _geom_angle_site_symmetry_3 
 _geom_angle_publ_flag 
O1 K1 O1 82.4(3) 4_455 3_554 ? 
O1 K1 O6 158.12(16) 4_455 3_444 ? 
O1 K1 O6 94.6(2) 3_554 3_444 ? 
O1 K1 O6 94.6(2) 4_455 4_545 ? 
O1 K1 O6 158.12(16) 3_554 4_545 ? 
O6 K1 O6 95.9(3) 3_444 4_545 ? 
O1 K1 O4 68.37(19) 4_455 . ? 
O1 K1 O4 91.9(2) 3_554 . ? 
O6 K1 O4 133.49(19) 3_444 . ? 
O6 K1 O4 67.06(19) 4_545 . ? 
O1 K1 O4 91.9(2) 4_455 2 ? 
O1 K1 O4 68.37(19) 3_554 2 ? 
O6 K1 O4 67.06(19) 3_444 2 ? 
O6 K1 O4 133.49(19) 4_545 2 ? 
O4 K1 O4 154.3(3) . 2 ? 
O1 K1 O3 135.58(18) 4_455 2 ? 
O1 K1 O3 76.31(18) 3_554 2 ? 
O6 K1 O3 63.26(16) 3_444 2 ? 
O6 K1 O3 91.43(19) 4_545 2 ? 
O4 K1 O3 73.85(18) . 2 ? 
O4 K1 O3 114.81(19) 2 2 ? 
O1 K1 O3 76.31(18) 4_455 . ? 
O1 K1 O3 135.58(18) 3_554 . ? 
O6 K1 O3 91.43(19) 3_444 . ? 
O6 K1 O3 63.26(16) 4_545 . ? 
O4 K1 O3 114.81(19) . . ? 
O4 K1 O3 73.85(18) 2 . ? 
O3 K1 O3 143.0(3) 2 . ? 
O1 K1 K2 138.82(16) 4_455 1_545 ? 
O1 K1 K2 138.82(16) 3_554 1_545 ? 
O6 K1 K2 47.95(15) 3_444 1_545 ? 
O6 K1 K2 47.95(15) 4_545 1_545 ? 
O4 K1 K2 102.87(17) . 1_545 ? 
O4 K1 K2 102.87(17) 2 1_545 ? 
O3 K1 K2 71.50(13) 2 1_545 ? 
O3 K1 K2 71.50(13) . 1_545 ? 
O1 K1 I1 23.93(11) 4_455 4_455 ? 
O1 K1 I1 94.74(19) 3_554 4_455 ? 
O6 K1 I1 136.71(11) 3_444 4_455 ? 
O6 K1 I1 90.68(15) 4_545 4_455 ? 
O4 K1 I1 88.25(16) . 4_455 ? 
O4 K1 I1 77.55(16) 2 4_455 ? 
O3 K1 I1 159.48(14) 2 4_455 ? 
O3 K1 I1 54.12(13) . 4_455 ? 
K2 K1 I1 123.52(6) 1_545 4_455 ? 
O1 K1 I1 94.74(19) 4_455 3_554 ? 
O1 K1 I1 23.93(11) 3_554 3_554 ? 
O6 K1 I1 90.68(15) 3_444 3_554 ? 
O6 K1 I1 136.71(11) 4_545 3_554 ? 
O4 K1 I1 77.55(16) . 3_554 ? 
O4 K1 I1 88.25(16) 2 3_554 ? 
O3 K1 I1 54.12(13) 2 3_554 ? 
O3 K1 I1 159.48(14) . 3_554 ? 
K2 K1 I1 123.52(6) 1_545 3_554 ? 
I1 K1 I1 112.96(12) 4_455 3_554 ? 
O1 K1 I2 44.20(11) 4_455 . ? 
O1 K1 I2 85.69(16) 3_554 . ? 
O6 K1 I2 157.52(11) 3_444 . ? 
O6 K1 I2 77.33(15) 4_545 . ? 
O4 K1 I2 24.33(14) . . ? 
O4 K1 I2 132.59(19) 2 . ? 
O3 K1 I2 95.19(12) 2 . ? 
O3 K1 I2 104.09(12) . . ? 
K2 K1 I2 121.74(6) 1_545 . ? 
I1 K1 I2 65.42(6) 4_455 . ? 
I1 K1 I2 80.50(9) 3_554 . ? 
O1 K2 O1 83.4(3) 3_554 4_455 ? 
O1 K2 O6 157.49(16) 3_554 4 ? 
O1 K2 O6 92.7(2) 4_455 4 ? 
O1 K2 O6 92.7(2) 3_554 3_454 ? 
O1 K2 O6 157.49(16) 4_455 3_454 ? 
O6 K2 O6 98.8(3) 4 3_454 ? 
O1 K2 O5 70.49(16) 3_554 2 ? 
O1 K2 O5 87.3(2) 4_455 2 ? 
O6 K2 O5 131.66(17) 4 2 ? 
O6 K2 O5 70.57(18) 3_454 2 ? 
O1 K2 O5 87.3(2) 3_554 . ? 
O1 K2 O5 70.49(16) 4_455 . ? 
O6 K2 O5 70.57(18) 4 . ? 
O6 K2 O5 131.66(17) 3_454 . ? 
O5 K2 O5 150.4(3) 2 . ? 
O1 K2 O2 54.89(17) 3_554 3_554 ? 
O1 K2 O2 112.47(19) 4_455 3_554 ? 
O6 K2 O2 107.44(16) 4 3_554 ? 
O6 K2 O2 82.45(17) 3_454 3_554 ? 
O5 K2 O2 117.05(17) 2 3_554 ? 
O5 K2 O2 58.61(17) . 3_554 ? 
O1 K2 O2 112.47(19) 3_554 4_455 ? 
O1 K2 O2 54.89(17) 4_455 4_455 ? 
O6 K2 O2 82.45(17) 4 4_455 ? 
O6 K2 O2 107.44(16) 3_454 4_455 ? 
O5 K2 O2 58.61(17) 2 4_455 ? 
O5 K2 O2 117.05(17) . 4_455 ? 
O2 K2 O2 165.1(3) 3_554 4_455 ? 
O1 K2 K1 138.30(17) 3_554 1_565 ? 
O1 K2 K1 138.30(17) 4_455 1_565 ? 
O6 K2 K1 49.40(15) 4 1_565 ? 
O6 K2 K1 49.40(15) 3_454 1_565 ? 
O5 K2 K1 104.78(14) 2 1_565 ? 
O5 K2 K1 104.78(14) . 1_565 ? 
O2 K2 K1 97.43(13) 3_554 1_565 ? 
O2 K2 K1 97.43(13) 4_455 1_565 ? 
O1 K2 I1 25.96(13) 3_554 3_554 ? 
O1 K2 I1 98.2(2) 4_455 3_554 ? 
O6 K2 I1 135.11(11) 4 3_554 ? 
O6 K2 I1 87.21(15) 3_454 3_554 ? 
O5 K2 I1 92.42(15) 2 3_554 ? 
O5 K2 I1 72.49(15) . 3_554 ? 
O2 K2 I1 28.94(11) 3_554 3_554 ? 
O2 K2 I1 138.08(16) 4_455 3_554 ? 
K1 K2 I1 120.46(7) 1_565 3_554 ? 
O1 K2 I1 98.2(2) 3_554 4_455 ? 
O1 K2 I1 25.96(13) 4_455 4_455 ? 
O6 K2 I1 87.21(15) 4 4_455 ? 
O6 K2 I1 135.11(11) 3_454 4_455 ? 
O5 K2 I1 72.49(15) 2 4_455 ? 
O5 K2 I1 92.42(14) . 4_455 ? 
O2 K2 I1 138.08(16) 3_554 4_455 ? 
O2 K2 I1 28.94(11) 4_455 4_455 ? 
K1 K2 I1 120.46(7) 1_565 4_455 ? 
I1 K2 I1 119.08(14) 3_554 4_455 ? 
O1 K2 I2 44.74(11) 3_554 2 ? 
O1 K2 I2 86.79(18) 4_455 2 ? 
O6 K2 I2 157.50(11) 4 2 ? 
O6 K2 I2 75.16(15) 3_454 2 ? 
O5 K2 I2 25.84(12) 2 2 ? 
O5 K2 I2 129.66(18) . 2 ? 
O2 K2 I2 93.42(12) 3_554 2 ? 
O2 K2 I2 78.91(12) 4_455 2 ? 
K1 K2 I2 120.87(7) 1_565 2 ? 
I1 K2 I2 66.98(7) 3_554 2 ? 
I1 K2 I2 82.58(9) 4_455 2 ? 
O2W Zn1 O1W 180.000(1) . . ? 
O2W Zn1 O2 85.66(18) . 4 ? 
O1W Zn1 O2 94.34(18) . 4 ? 
O2W Zn1 O2 85.66(18) . 3_554 ? 
O1W Zn1 O2 94.34(18) . 3_554 ? 
O2 Zn1 O2 171.3(4) 4 3_554 ? 
O2W Zn1 O5 94.42(16) . 2_655 ? 
O1W Zn1 O5 85.58(16) . 2_655 ? 
O2 Zn1 O5 87.5(2) 4 2_655 ? 
O2 Zn1 O5 93.1(2) 3_554 2_655 ? 
O2W Zn1 O5 94.42(16) . . ? 
O1W Zn1 O5 85.58(16) . . ? 
O2 Zn1 O5 93.1(2) 4 . ? 
O2 Zn1 O5 87.5(2) 3_554 . ? 
O5 Zn1 O5 171.2(3) 2_655 . ? 
O3 I1 O1 101.5(3) . . ? 
O3 I1 O2 97.5(3) . . ? 
O1 I1 O2 97.9(3) . . ? 
O3 I1 K2 103.9(2) . 3_445 ? 
O1 I1 K2 41.3(3) . 3_445 ? 
O2 I1 K2 56.63(19) . 3_445 ? 
O3 I1 K1 132.85(19) . 3_445 ? 
O1 I1 K1 38.1(3) . 3_445 ? 
O2 I1 K1 108.9(2) . 3_445 ? 
K2 I1 K1 63.98(8) 3_445 3_445 ? 
O3 I1 K1 40.76(19) . . ? 
O1 I1 K1 141.1(2) . . ? 
O2 I1 K1 82.5(2) . . ? 
K2 I1 K1 124.10(12) 3_445 . ? 
K1 I1 K1 168.44(8) 3_445 . ? 
O6 I2 O4 100.2(3) . . ? 
O6 I2 O5 101.4(3) . . ? 
O4 I2 O5 97.9(3) . . ? 
O6 I2 K2 144.7(2) . . ? 
O4 I2 K2 93.5(2) . . ? 
O5 I2 K2 44.1(2) . . ? 
O6 I2 K1 139.6(2) . . ? 
O4 I2 K1 39.62(19) . . ? 
O5 I2 K1 90.6(2) . . ? 
K2 I2 K1 62.61(8) . . ? 
O6 I2 K1 38.2(2) . 3 ? 
O4 I2 K1 138.29(19) . 3 ? 
O5 I2 K1 95.1(2) . 3 ? 
K2 I2 K1 122.36(11) . 3 ? 
K1 I2 K1 174.27(8) . 3 ? 
O6 I2 K2 34.9(2) . 3_545 ? 
O4 I2 K2 90.7(2) . 3_545 ? 
O5 I2 K2 136.2(2) . 3_545 ? 
K2 I2 K2 175.75(9) . 3_545 ? 
K1 I2 K2 120.59(11) . 3_545 ? 
K1 I2 K2 54.28(7) 3 3_545 ? 
I1 O1 K2 112.8(3) . 3_445 ? 
I1 O1 K1 117.9(3) . 3_445 ? 
K2 O1 K1 97.1(2) 3_445 3_445 ? 
I1 O2 Zn1 119.9(3) . 3_445 ? 
I1 O2 K2 94.4(2) . 3_445 ? 
Zn1 O2 K2 102.6(2) 3_445 3_445 ? 
I1 O3 K1 115.8(3) . . ? 
I2 O4 K1 116.0(3) . . ? 
I2 O5 Zn1 129.6(3) . . ? 
I2 O5 K2 110.1(3) . . ? 
Zn1 O5 K2 109.3(3) . . ? 
I2 O6 K2 122.8(3) . 3_545 ? 
I2 O6 K1 118.1(3) . 3 ? 
K2 O6 K1 82.65(18) 3_545 3 ? 
Zn1 O1W H1WA 109.5 . . ? 
Zn1 O1W H1WB 109.5 . . ? 
H1WA O1W H1WB 109.5 . . ? 
Zn1 O2W H2WA 109.5 . . ? 
Zn1 O2W H2WB 109.5 . . ? 
H2WA O2W H2WB 109.5 . . ? 
 
_diffrn_measured_fraction_theta_max    0.977 
_diffrn_reflns_theta_full              27.44 
_diffrn_measured_fraction_theta_full   0.977 
_refine_diff_density_max    1.761 
_refine_diff_density_min   -1.066 
_refine_diff_density_rms    0.195 

#===end

data_comp4 
 
_audit_creation_method            SHELXL-97 
_chemical_name_systematic 
; 
 ? 
; 
_chemical_name_common             ? 
_chemical_melting_point           ? 
_chemical_formula_moiety          ? 
_chemical_formula_sum 
 'H4 I4 K2 Mg O14' 
_chemical_formula_weight          838.14 
 
loop_ 
 _atom_type_symbol 
 _atom_type_description 
 _atom_type_scat_dispersion_real 
 _atom_type_scat_dispersion_imag 
 _atom_type_scat_source 
 'O'  'O'   0.0106   0.0060 
 'International Tables Vol C Tables 4.2.6.8 and 6.1.1.4' 
 'H'  'H'   0.0000   0.0000 
 'International Tables Vol C Tables 4.2.6.8 and 6.1.1.4' 
 'K'  'K'   0.2009   0.2494 
 'International Tables Vol C Tables 4.2.6.8 and 6.1.1.4' 
 'Mg'  'Mg'   0.0486   0.0363 
 'International Tables Vol C Tables 4.2.6.8 and 6.1.1.4' 
 'I'  'I'  -0.4742   1.8119 
 'International Tables Vol C Tables 4.2.6.8 and 6.1.1.4' 
 
_symmetry_cell_setting            monoclinic 
_symmetry_space_group_name_H-M    I2
 
loop_ 
 _symmetry_equiv_pos_as_xyz 
 'x, y, z' 
 '-x, y, -z' 
 'x+1/2, y+1/2, z+1/2' 
 '-x+1/2, y+1/2, -z+1/2' 
 
_cell_length_a                    8.305(9) 
_cell_length_b                    7.760(8) 
_cell_length_c                    11.101(12) 
_cell_angle_alpha                 90.00 
_cell_angle_beta                  90.009(18) 
_cell_angle_gamma                 90.00 
_cell_volume                      715.4(13) 
_cell_formula_units_Z             2 
_cell_measurement_temperature     293(2) 
_cell_measurement_reflns_used     349 
_cell_measurement_theta_min       3.0629  
_cell_measurement_theta_max       27.4526 
 
_exptl_crystal_description        'rectangle' 
_exptl_crystal_colour             'colorless' 
_exptl_crystal_size_max           0.2000 
_exptl_crystal_size_mid           0.2000 
_exptl_crystal_size_min           0.2000 
_exptl_crystal_density_meas       ? 
_exptl_crystal_density_diffrn     3.891 
_exptl_crystal_density_method     'not measured' 
_exptl_crystal_F_000              756 
_exptl_absorpt_coefficient_mu     9.405 
_exptl_absorpt_correction_type    'Multi-scan' 
_exptl_absorpt_correction_T_min   0.4358
_exptl_absorpt_correction_T_max   1.0000 
_exptl_absorpt_process_details    ? 
 
_exptl_special_details 
; 
 ? 
; 
 
_diffrn_ambient_temperature       293(2) 
_diffrn_radiation_wavelength      0.71073 
_diffrn_radiation_type            MoK\a 
_diffrn_radiation_source          'fine-focus sealed tube' 
_diffrn_radiation_monochromator   graphite 
_diffrn_measurement_device_type   Mercury2 
_diffrn_measurement_method        'CCD_Profile_fitting' 
_diffrn_detector_area_resol_mean  13.6612 
_diffrn_standards_number          ? 
_diffrn_standards_interval_count  ? 
_diffrn_standards_interval_time   ? 
_diffrn_standards_decay_%         ? 
_diffrn_reflns_number             2785 
_diffrn_reflns_av_R_equivalents   0.0816 
_diffrn_reflns_av_sigmaI/netI     0.0821 
_diffrn_reflns_limit_h_min        -9 
_diffrn_reflns_limit_h_max        10 
_diffrn_reflns_limit_k_min        -10 
_diffrn_reflns_limit_k_max        10 
_diffrn_reflns_limit_l_min        -12 
_diffrn_reflns_limit_l_max        14 
_diffrn_reflns_theta_min          3.06 
_diffrn_reflns_theta_max          27.77 
_reflns_number_total              1650 
_reflns_number_gt                 1541 
_reflns_threshold_expression      >2sigma(I) 
 
_computing_data_collection        ? 
_computing_cell_refinement        ? 
_computing_data_reduction         ? 
_computing_structure_solution     'SHELXS-97 (Sheldrick, 1990)' 
_computing_structure_refinement   'SHELXL-97 (Sheldrick, 1997)' 
_computing_molecular_graphics     ? 
_computing_publication_material   ? 
 
_refine_special_details 
; 
 Refinement of F^2^ against ALL reflections.  The weighted R-factor wR and 
 goodness of fit S are based on F^2^, conventional R-factors R are based 
 on F, with F set to zero for negative F^2^. The threshold expression of 
 F^2^ > 2sigma(F^2^) is used only for calculating R-factors(gt) etc. and is 
 not relevant to the choice of reflections for refinement.  R-factors based 
 on F^2^ are statistically about twice as large as those based on F, and R- 
 factors based on ALL data will be even larger. 
; 
 
_refine_ls_structure_factor_coef  Fsqd  
_refine_ls_matrix_type            full 
_refine_ls_weighting_scheme       calc  
_refine_ls_weighting_details 
 'calc w=1/[\s^2^(Fo^2^)+(0.1192P)^2^+0.0000P] where P=(Fo^2^+2Fc^2^)/3' 
_atom_sites_solution_primary      direct 
_atom_sites_solution_secondary    difmap 
_atom_sites_solution_hydrogens    geom 
_refine_ls_hydrogen_treatment     none 
_refine_ls_extinction_method      none 
_refine_ls_extinction_coef        ? 
_refine_ls_abs_structure_details 
 'Flack H D (1983), Acta Cryst. A39, 876-881' 
_refine_ls_abs_structure_Flack    0.05(8) 
_refine_ls_number_reflns          1650 
_refine_ls_number_parameters      98 
_refine_ls_number_restraints      1 
_refine_ls_R_factor_all           0.0699 
_refine_ls_R_factor_gt            0.0676 
_refine_ls_wR_factor_ref          0.1803 
_refine_ls_wR_factor_gt           0.1760 
_refine_ls_goodness_of_fit_ref    1.056 
_refine_ls_restrained_S_all       1.056 
_refine_ls_shift/su_max           0.000 
_refine_ls_shift/su_mean          0.000 
 
loop_ 
 _atom_site_label 
 _atom_site_type_symbol 
 _atom_site_fract_x 
 _atom_site_fract_y 
 _atom_site_fract_z 
 _atom_site_U_iso_or_equiv 
 _atom_site_adp_type 
 _atom_site_occupancy 
 _atom_site_symmetry_multiplicity 
 _atom_site_calc_flag 
 _atom_site_refinement_flags 
 _atom_site_disorder_assembly 
 _atom_site_disorder_group 
K1 K 1.0000 1.8678(8) 1.0000 0.0247(10) Uani 1 2 d S . . 
K2 K 1.0000 1.3402(8) 1.0000 0.0289(13) Uani 1 2 d S . . 
Mg1 Mg 0.5000 1.4170(10) 1.0000 0.0238(16) Uani 1 2 d S . . 
I1 I 1.23971(7) 2.09030(18) 0.72180(6) 0.0177(3) Uani 1 1 d . . . 
I2 I 0.74771(7) 1.59942(5) 0.76247(7) 0.0177(3) Uani 1 1 d . . . 
O1 O 1.4388(9) 2.0988(17) 0.6555(8) 0.0259(18) Uani 1 1 d . . . 
O2 O 1.1698(12) 1.9005(12) 0.6417(9) 0.025(2) Uani 1 1 d . . . 
O3 O 1.2783(12) 1.9904(15) 0.8643(9) 0.029(2) Uani 1 1 d . . . 
O4 O 0.7270(12) 1.7921(15) 0.8579(11) 0.025(2) Uani 1 1 d . . . 
O5 O 0.7056(13) 1.4380(13) 0.8767(9) 0.022(2) Uani 1 1 d . . . 
O6 O 0.5588(10) 1.6128(17) 0.6815(8) 0.028(2) Uani 1 1 d . . . 
O1W O 0.5000 1.6815(19) 1.0000 0.029(3) Uani 1 2 d S . . 
H1WA H 0.4252 1.7181 1.0457 0.044 Uiso 0.50 1 d PR . . 
H1WB H 0.5904 1.7181 1.0257 0.044 Uiso 0.50 1 d PR . . 
O2W O 0.5000 1.155(2) 1.0000 0.041(4) Uani 1 2 d S . . 
H2WA H 0.5904 1.1180 1.0257 0.061 Uiso 0.50 1 d PR . . 
H2WB H 0.4844 1.1180 0.9286 0.061 Uiso 0.50 1 d PR . . 
 
loop_ 
 _atom_site_aniso_label 
 _atom_site_aniso_U_11 
 _atom_site_aniso_U_22 
 _atom_site_aniso_U_33 
 _atom_site_aniso_U_23 
 _atom_site_aniso_U_13 
 _atom_site_aniso_U_12 
K1 0.028(3) 0.023(2) 0.022(2) 0.000 0.0008(18) 0.000 
K2 0.043(3) 0.023(3) 0.021(2) 0.000 -0.004(2) 0.000 
Mg1 0.020(3) 0.019(3) 0.032(4) 0.000 0.005(3) 0.000 
I1 0.0187(4) 0.0171(5) 0.0174(4) 0.0002(6) 0.0040(3) -0.0007(4) 
I2 0.0179(4) 0.0182(6) 0.0169(4) 0.0021(6) 0.0052(3) 0.0001(4) 
O1 0.022(4) 0.027(4) 0.029(4) -0.004(6) -0.002(3) -0.001(5) 
O2 0.031(5) 0.021(5) 0.023(5) -0.002(4) 0.004(4) -0.002(4) 
O3 0.037(6) 0.023(5) 0.026(5) 0.012(5) 0.003(5) 0.003(4) 
O4 0.020(5) 0.027(5) 0.027(5) -0.002(5) -0.004(4) 0.000(5) 
O5 0.027(6) 0.023(5) 0.017(5) 0.007(4) 0.007(4) -0.003(4) 
O6 0.023(4) 0.037(6) 0.025(4) 0.005(5) -0.007(3) 0.000(5) 
O1W 0.042(8) 0.021(7) 0.026(7) 0.000 0.017(7) 0.000 
O2W 0.047(9) 0.034(9) 0.042(9) 0.000 -0.023(8) 0.000 
 
_geom_special_details 
; 
 All esds (except the esd in the dihedral angle between two l.s. planes) 
 are estimated using the full covariance matrix.  The cell esds are taken 
 into account individually in the estimation of esds in distances, angles 
 and torsion angles; correlations between esds in cell parameters are only 
 used when they are defined by crystal symmetry.  An approximate (isotropic) 
 treatment of cell esds is used for estimating esds involving l.s. planes. 
; 
 
loop_ 
 _geom_bond_atom_site_label_1 
 _geom_bond_atom_site_label_2 
 _geom_bond_distance 
 _geom_bond_site_symmetry_2 
 _geom_bond_publ_flag 
K1 O1 2.756(12) 4_746 ? 
K1 O1 2.756(13) 3_445 ? 
K1 O6 2.813(12) 3 ? 
K1 O6 2.813(12) 4_656 ? 
K1 O4 2.824(11) . ? 
K1 O4 2.824(11) 2_757 ? 
K1 O3 2.918(10) . ? 
K1 O3 2.918(10) 2_757 ? 
K1 K2 3.666(7) 1_565 ? 
K1 I1 3.921(5) 4_746 ? 
K1 I1 3.921(5) 3_445 ? 
K1 I2 3.959(4) . ? 
K2 O1 2.696(12) 3_445 ? 
K2 O1 2.696(12) 4_746 ? 
K2 O6 2.723(11) 4_646 ? 
K2 O6 2.722(11) 3_545 ? 
K2 O5 2.903(12) 2_757 ? 
K2 O5 2.903(12) . ? 
K2 O2 3.196(10) 4_746 ? 
K2 O2 3.196(10) 3_445 ? 
K2 K1 3.666(7) 1_545 ? 
K2 I1 3.808(4) 3_445 ? 
K2 I1 3.808(4) 4_746 ? 
K2 I2 3.923(4) 2_757 ? 
Mg1 O2W 2.036(18) . ? 
Mg1 O1W 2.053(17) . ? 
Mg1 O2 2.116(11) 4_646 ? 
Mg1 O2 2.116(11) 3_445 ? 
Mg1 O5 2.195(10) . ? 
Mg1 O5 2.195(10) 2_657 ? 
Mg1 K2 4.195(5) 1_455 ? 
I1 O3 1.791(10) . ? 
I1 O1 1.811(8) . ? 
I1 O2 1.816(10) . ? 
I1 K2 3.808(4) 3_554 ? 
I1 K1 3.921(5) 3_554 ? 
I2 O6 1.811(8) . ? 
I2 O5 1.816(10) . ? 
I2 O4 1.840(12) . ? 
I2 K1 3.994(4) 3_444 ? 
I2 K2 4.026(4) 3_454 ? 
O1 K2 2.696(12) 3_554 ? 
O1 K1 2.756(12) 3_554 ? 
O2 Mg1 2.116(10) 3_554 ? 
O2 K2 3.196(10) 3_554 ? 
O6 K2 2.722(11) 3_454 ? 
O6 K1 2.813(12) 3_444 ? 
O1W H1WA 0.8510 . ? 
O1W H1WB 0.8523 . ? 
O2W H2WA 0.8523 . ? 
O2W H2WB 0.8520 . ? 
 
loop_ 
 _geom_angle_atom_site_label_1 
 _geom_angle_atom_site_label_2 
 _geom_angle_atom_site_label_3 
 _geom_angle 
 _geom_angle_site_symmetry_1 
 _geom_angle_site_symmetry_3 
 _geom_angle_publ_flag 
O1 K1 O1 81.5(5) 4_746 3_445 ? 
O1 K1 O6 158.2(3) 4_746 3 ? 
O1 K1 O6 95.5(3) 3_445 3 ? 
O1 K1 O6 95.5(3) 4_746 4_656 ? 
O1 K1 O6 158.2(3) 3_445 4_656 ? 
O6 K1 O6 94.9(5) 3 4_656 ? 
O1 K1 O4 68.9(3) 4_746 . ? 
O1 K1 O4 92.5(3) 3_445 . ? 
O6 K1 O4 132.9(3) 3 . ? 
O6 K1 O4 66.5(3) 4_656 . ? 
O1 K1 O4 92.5(3) 4_746 2_757 ? 
O1 K1 O4 68.9(3) 3_445 2_757 ? 
O6 K1 O4 66.5(3) 3 2_757 ? 
O6 K1 O4 132.9(3) 4_656 2_757 ? 
O4 K1 O4 156.0(5) . 2_757 ? 
O1 K1 O3 77.1(3) 4_746 . ? 
O1 K1 O3 135.7(3) 3_445 . ? 
O6 K1 O3 90.7(3) 3 . ? 
O6 K1 O3 63.1(3) 4_656 . ? 
O4 K1 O3 114.5(3) . . ? 
O4 K1 O3 73.8(3) 2_757 . ? 
O1 K1 O3 135.7(3) 4_746 2_757 ? 
O1 K1 O3 77.1(3) 3_445 2_757 ? 
O6 K1 O3 63.1(3) 3 2_757 ? 
O6 K1 O3 90.7(3) 4_656 2_757 ? 
O4 K1 O3 73.8(3) . 2_757 ? 
O4 K1 O3 114.5(3) 2_757 2_757 ? 
O3 K1 O3 141.9(5) . 2_757 ? 
O1 K1 K2 139.2(2) 4_746 1_565 ? 
O1 K1 K2 139.2(2) 3_445 1_565 ? 
O6 K1 K2 47.5(2) 3 1_565 ? 
O6 K1 K2 47.5(2) 4_656 1_565 ? 
O4 K1 K2 102.0(3) . 1_565 ? 
O4 K1 K2 102.0(3) 2_757 1_565 ? 
O3 K1 K2 71.0(3) . 1_565 ? 
O3 K1 K2 71.0(3) 2_757 1_565 ? 
O1 K1 I1 24.36(18) 4_746 4_746 ? 
O1 K1 I1 94.5(3) 3_445 4_746 ? 
O6 K1 I1 136.49(18) 3 4_746 ? 
O6 K1 I1 91.0(2) 4_656 4_746 ? 
O4 K1 I1 88.7(3) . 4_746 ? 
O4 K1 I1 78.1(3) 2_757 4_746 ? 
O3 K1 I1 54.4(2) . 4_746 ? 
O3 K1 I1 160.0(3) 2_757 4_746 ? 
K2 K1 I1 123.31(9) 1_565 4_746 ? 
O1 K1 I1 94.5(3) 4_746 3_445 ? 
O1 K1 I1 24.36(18) 3_445 3_445 ? 
O6 K1 I1 91.0(2) 3 3_445 ? 
O6 K1 I1 136.49(18) 4_656 3_445 ? 
O4 K1 I1 78.1(3) . 3_445 ? 
O4 K1 I1 88.7(3) 2_757 3_445 ? 
O3 K1 I1 160.0(3) . 3_445 ? 
O3 K1 I1 54.4(2) 2_757 3_445 ? 
K2 K1 I1 123.31(9) 1_565 3_445 ? 
I1 K1 I1 113.38(19) 4_746 3_445 ? 
O1 K1 I2 44.12(17) 4_746 . ? 
O1 K1 I2 85.5(2) 3_445 . ? 
O6 K1 I2 157.56(19) 3 . ? 
O6 K1 I2 77.7(2) 4_656 . ? 
O4 K1 I2 25.0(2) . . ? 
O4 K1 I2 133.4(3) 2_757 . ? 
O3 K1 I2 104.3(2) . . ? 
O3 K1 I2 95.5(2) 2_757 . ? 
K2 K1 I2 121.73(9) 1_565 . ? 
I1 K1 I2 65.46(10) 4_746 . ? 
I1 K1 I2 80.65(12) 3_445 . ? 
O1 K2 O1 83.8(5) 3_445 4_746 ? 
O1 K2 O6 157.3(3) 3_445 4_646 ? 
O1 K2 O6 92.4(3) 4_746 4_646 ? 
O1 K2 O6 92.4(3) 3_445 3_545 ? 
O1 K2 O6 157.3(3) 4_746 3_545 ? 
O6 K2 O6 99.2(5) 4_646 3_545 ? 
O1 K2 O5 70.3(3) 3_445 2_757 ? 
O1 K2 O5 87.1(3) 4_746 2_757 ? 
O6 K2 O5 132.0(3) 4_646 2_757 ? 
O6 K2 O5 70.7(3) 3_545 2_757 ? 
O1 K2 O5 87.1(3) 3_445 . ? 
O1 K2 O5 70.3(3) 4_746 . ? 
O6 K2 O5 70.7(3) 4_646 . ? 
O6 K2 O5 132.0(3) 3_545 . ? 
O5 K2 O5 149.7(4) 2_757 . ? 
O1 K2 O2 111.6(3) 3_445 4_746 ? 
O1 K2 O2 54.1(3) 4_746 4_746 ? 
O6 K2 O2 83.4(3) 4_646 4_746 ? 
O6 K2 O2 107.8(3) 3_545 4_746 ? 
O5 K2 O2 58.1(3) 2_757 4_746 ? 
O5 K2 O2 116.9(3) . 4_746 ? 
O1 K2 O2 54.1(3) 3_445 3_445 ? 
O1 K2 O2 111.6(3) 4_746 3_445 ? 
O6 K2 O2 107.8(3) 4_646 3_445 ? 
O6 K2 O2 83.4(3) 3_545 3_445 ? 
O5 K2 O2 116.9(3) 2_757 3_445 ? 
O5 K2 O2 58.1(3) . 3_445 ? 
O2 K2 O2 163.2(4) 4_746 3_445 ? 
O1 K2 K1 138.1(2) 3_445 1_545 ? 
O1 K2 K1 138.1(2) 4_746 1_545 ? 
O6 K2 K1 49.6(3) 4_646 1_545 ? 
O6 K2 K1 49.6(3) 3_545 1_545 ? 
O5 K2 K1 105.2(2) 2_757 1_545 ? 
O5 K2 K1 105.2(2) . 1_545 ? 
O2 K2 K1 98.4(2) 4_746 1_545 ? 
O2 K2 K1 98.4(2) 3_445 1_545 ? 
O1 K2 I1 25.77(19) 3_445 3_445 ? 
O1 K2 I1 98.1(3) 4_746 3_445 ? 
O6 K2 I1 134.99(19) 4_646 3_445 ? 
O6 K2 I1 87.3(2) 3_545 3_445 ? 
O5 K2 I1 92.3(2) 2_757 3_445 ? 
O5 K2 I1 72.2(2) . 3_445 ? 
O2 K2 I1 136.9(3) 4_746 3_445 ? 
O2 K2 I1 28.37(18) 3_445 3_445 ? 
K1 K2 I1 120.64(10) 1_545 3_445 ? 
O1 K2 I1 98.1(3) 3_445 4_746 ? 
O1 K2 I1 25.77(19) 4_746 4_746 ? 
O6 K2 I1 87.3(2) 4_646 4_746 ? 
O6 K2 I1 134.99(19) 3_545 4_746 ? 
O5 K2 I1 72.2(2) 2_757 4_746 ? 
O5 K2 I1 92.3(2) . 4_746 ? 
O2 K2 I1 28.37(17) 4_746 4_746 ? 
O2 K2 I1 136.9(3) 3_445 4_746 ? 
K1 K2 I1 120.64(10) 1_545 4_746 ? 
I1 K2 I1 118.72(19) 3_445 4_746 ? 
O1 K2 I2 44.64(17) 3_445 2_757 ? 
O1 K2 I2 87.0(2) 4_746 2_757 ? 
O6 K2 I2 157.76(19) 4_646 2_757 ? 
O6 K2 I2 74.9(2) 3_545 2_757 ? 
O5 K2 I2 25.74(18) 2_757 2_757 ? 
O5 K2 I2 129.2(3) . 2_757 ? 
O2 K2 I2 78.3(2) 4_746 2_757 ? 
O2 K2 I2 93.0(2) 3_445 2_757 ? 
K1 K2 I2 120.85(9) 1_545 2_757 ? 
I1 K2 I2 66.88(10) 3_445 2_757 ? 
I1 K2 I2 82.53(12) 4_746 2_757 ? 
O2W Mg1 O1W 180.000(10) . . ? 
O2W Mg1 O2 86.5(3) . 4_646 ? 
O1W Mg1 O2 93.5(3) . 4_646 ? 
O2W Mg1 O2 86.5(3) . 3_445 ? 
O1W Mg1 O2 93.5(3) . 3_445 ? 
O2 Mg1 O2 173.1(6) 4_646 3_445 ? 
O2W Mg1 O5 94.3(3) . . ? 
O1W Mg1 O5 85.7(3) . . ? 
O2 Mg1 O5 93.4(4) 4_646 . ? 
O2 Mg1 O5 87.1(4) 3_445 . ? 
O2W Mg1 O5 94.3(3) . 2_657 ? 
O1W Mg1 O5 85.7(3) . 2_657 ? 
O2 Mg1 O5 87.1(4) 4_646 2_657 ? 
O2 Mg1 O5 93.4(4) 3_445 2_657 ? 
O5 Mg1 O5 171.5(7) . 2_657 ? 
O2W Mg1 K2 81.83(14) . 1_455 ? 
O1W Mg1 K2 98.17(14) . 1_455 ? 
O2 Mg1 K2 48.1(3) 4_646 1_455 ? 
O2 Mg1 K2 130.6(3) 3_445 1_455 ? 
O5 Mg1 K2 141.3(3) . 1_455 ? 
O5 Mg1 K2 40.6(3) 2_657 1_455 ? 
O2W Mg1 K2 81.83(14) . . ? 
O1W Mg1 K2 98.17(14) . . ? 
O2 Mg1 K2 130.6(3) 4_646 . ? 
O2 Mg1 K2 48.1(3) 3_445 . ? 
O5 Mg1 K2 40.6(3) . . ? 
O5 Mg1 K2 141.3(3) 2_657 . ? 
K2 Mg1 K2 163.7(3) 1_455 . ? 
O3 I1 O1 102.2(5) . . ? 
O3 I1 O2 98.0(5) . . ? 
O1 I1 O2 97.0(5) . . ? 
O3 I1 K2 104.4(4) . 3_554 ? 
O1 I1 K2 40.3(4) . 3_554 ? 
O2 I1 K2 56.7(3) . 3_554 ? 
O3 I1 K1 133.9(3) . 3_554 ? 
O1 I1 K1 38.9(4) . 3_554 ? 
O2 I1 K1 108.3(3) . 3_554 ? 
K2 I1 K1 63.95(10) 3_554 3_554 ? 
O3 I1 K1 39.8(3) . . ? 
O1 I1 K1 140.6(4) . . ? 
O2 I1 K1 82.6(3) . . ? 
K2 I1 K1 123.60(17) 3_554 . ? 
K1 I1 K1 169.01(13) 3_554 . ? 
O6 I2 O5 102.7(5) . . ? 
O6 I2 O4 99.1(5) . . ? 
O5 I2 O4 98.1(5) . . ? 
O6 I2 K2 145.7(4) . . ? 
O5 I2 K2 43.9(4) . . ? 
O4 I2 K2 94.6(4) . . ? 
O6 I2 K1 139.4(4) . . ? 
O5 I2 K1 90.0(4) . . ? 
O4 I2 K1 40.4(3) . . ? 
K2 I2 K1 62.58(10) . . ? 
O6 I2 K1 38.5(4) . 3_444 ? 
O5 I2 K1 95.7(4) . 3_444 ? 
O4 I2 K1 137.5(3) . 3_444 ? 
K2 I2 K1 122.32(16) . 3_444 ? 
K1 I2 K1 174.27(14) . 3_444 ? 
O6 I2 K2 34.1(4) . 3_454 ? 
O5 I2 K2 136.6(4) . 3_454 ? 
O4 I2 K2 89.5(4) . 3_454 ? 
K2 I2 K2 175.73(12) . 3_454 ? 
K1 I2 K2 120.54(16) . 3_454 ? 
K1 I2 K2 54.40(10) 3_444 3_454 ? 
I1 O1 K2 113.9(5) . 3_554 ? 
I1 O1 K1 116.8(5) . 3_554 ? 
K2 O1 K1 97.3(3) 3_554 3_554 ? 
I1 O2 Mg1 121.9(5) . 3_554 ? 
I1 O2 K2 94.9(4) . 3_554 ? 
Mg1 O2 K2 102.4(4) 3_554 3_554 ? 
I1 O3 K1 117.1(5) . . ? 
I2 O4 K1 114.6(5) . . ? 
I2 O5 Mg1 129.5(6) . . ? 
I2 O5 K2 110.3(5) . . ? 
Mg1 O5 K2 110.0(4) . . ? 
I2 O6 K2 124.0(5) . 3_454 ? 
I2 O6 K1 117.8(5) . 3_444 ? 
K2 O6 K1 82.9(3) 3_454 3_444 ? 
Mg1 O1W H1WA 109.5 . . ? 
Mg1 O1W H1WB 109.5 . . ? 
H1WA O1W H1WB 109.4 . . ? 
Mg1 O2W H2WA 109.5 . . ? 
Mg1 O2W H2WB 109.5 . . ? 
H2WA O2W H2WB 109.5 . . ? 
 
_diffrn_measured_fraction_theta_max    0.991 
_diffrn_reflns_theta_full              27.77 
_diffrn_measured_fraction_theta_full   0.991 
_refine_diff_density_max    3.520 
_refine_diff_density_min   -3.220 
_refine_diff_density_rms    0.478 

#===end
